# Supplementary material for: Functionally important segments in proteins dissected using Gene Ontology and geometric clustering of peptide fragments
Source: PubMed Central journal article supplement (PMC2397504; doi:10.1186/gb-2008-9-3-r52), 2008-03-10
Supplement: gb-2008-9-3-r52-S1.pdf [file gb-2008-9-3-r52-S1.pdf]

**Table S1. List of PDB files used in our work culled from FSSP library**

| <b>PDB Code</b> | <b>Chain Identifier</b> | <b>Number of residues considered*</b> | <b>Resolution (Å<sup>2</sup>)</b> | <b>R-factor</b> |
|-----------------|-------------------------|---------------------------------------|-----------------------------------|-----------------|
| 1a0a            | A                       | 63                                    | 2.8                               | 0.23            |
| 1a0i            | A                       | 315                                   | 2.6                               | 0.222           |
| 1a0r            | P                       | 188                                   | 2.8                               | 0.228           |
| 1a1t            | A                       | 55                                    | N/A                               |                 |
| 1a26            | A                       | 335                                   | 2.25                              | 0.168           |
| 1a2z            | A                       | 220                                   | 1.73                              | 0.18            |
| 1a34            | A                       | 143                                   | 1.81                              | 0.179           |
| 1a3a            | C                       | 146                                   | 1.8                               | 0.19            |
| 1a3k            | A                       | 137                                   | 2.1                               | 0.17            |
| 1a3q            | A                       | 250                                   | 2.1                               | 0.219           |
| 1a5j            | A                       | 110                                   | N/A                               |                 |
| 1a6f            | A                       | 106                                   | 2.6                               | 0.205           |
| 1a6q            | A                       | 359                                   | 2                                 | 0.214           |
| 1a6r            | A                       | 458                                   | 2.05                              | 0.193           |
| 1a6s            | A                       | 87                                    | N/A                               |                 |
| 1a76            | A                       | 315                                   | 2                                 | 0.214           |
| 1a79            | A                       | 166                                   | 2.28                              | 0.2             |
| 1a87            | A                       | 286                                   | 3.1                               | 0.173           |
| 1a9o            | A                       | 283                                   | 2                                 | 0.2             |
| 1aa0            | A                       | 112                                   | 2.2                               | 0.216           |
| 1aa3            | A                       | 63                                    | N/A                               |                 |
| 1aa7            | A                       | 158                                   | 2.08                              | 0.208           |
| 1abe            | A                       | 302                                   | 1.7                               | 0.137           |
| 1abv            | A                       | 105                                   | N/A                               |                 |
| 1aci            | A                       | 76                                    | N/A                               |                 |
| 1acz            | A                       | 108                                   | N/A                               |                 |
| 1adq            | H                       | 120                                   | 3.15                              | 0.225           |
| 1ady            | A                       | 382                                   | 2.8                               | 0.26            |
| 1ae9            | A                       | 171                                   | 1.9                               | 0.199           |
| 1af7            | A                       | 274                                   | 2                                 | 0.2             |
| 1afo            | A                       | 40                                    | N/A                               |                 |
| 1afp            | A                       | 51                                    | N/A                               |                 |
| 1agq            | B                       | 96                                    | 1.9                               | 0.203           |
| 1ah1            | A                       | 129                                   | N/A                               |                 |
| 1aho            | A                       | 62                                    | 0.96                              | 0.158           |
| 1aj6            | A                       | 193                                   | 2.3                               | 0.195           |
| 1ajj            | A                       | 37                                    | 1.7                               | 0.209           |
| 1ak0            | A                       | 264                                   | 1.8                               | 0.207           |
| 1ak2            | A                       | 214                                   | 1.92                              | 0.222           |
| 1akl            | A                       | 470                                   | 2                                 | 0.197           |
| 1ako            | A                       | 268                                   | 1.7                               | 0.169           |
| 1am7            | A                       | 149                                   | 2.3                               | 0.163           |
| 1amx            | A                       | 150                                   | 2                                 | 0.2             |
| 1anv            | A                       | 297                                   | 2.7                               | 0.204           |
| 1ao7            | E                       | 168                                   | 2.6                               | 0.245           |
| 1aoc            | A                       | 146                                   | 2                                 | 0.191           |

|      |     |         |      |       |
|------|-----|---------|------|-------|
| 1aoh | B   | 147     | 1.7  | 0.194 |
| 1aoj | A   | 60      | 2.5  | 0.193 |
| 1aol | A   | 228     | 2    | 0.223 |
| 1aov | A   | 611     | 4    | 0.21  |
| 1aox | A   | 196     | 2.1  | 0.219 |
| 1aoy | A   | 78      | N/A  |       |
| 1ash | A   | 147     | 2.15 | 0.179 |
| 1at0 | A   | 142     | 1.9  | 0.218 |
| 1atg | A   | 231     | 1.2  | 0.164 |
| 1au7 | A   | 130     | 2.3  | 0.23  |
| 1aun | A   | 208     | 1.8  | 0.169 |
| 1awd | A   | 94      | 1.4  | 0.146 |
| 1awj | A   | 77      | N/A  |       |
| 1ay2 | A   | 158     | 2.6  | 0.194 |
| 1azo | A   | 211     | 1.7  | 0.203 |
| 1azs | A   | 112     | 2.3  | 0.219 |
| 1azt | B   | 333     | 2.3  | 0.219 |
| 1b0n | A   | 103     | 1.9  | 0.199 |
| 1b0u | A   | 258     | 1.5  | 0.185 |
| 1b12 | A   | 235     | 1.95 | 0.22  |
| 1b22 | A   | 70      | N/A  |       |
| 1b25 | A   | 611     | 1.85 | 0.174 |
| 1b2m | A   | 104     | 2    | 0.187 |
| 1b2p | A   | 119     | 1.7  | 0.186 |
| 1b2u | D   | 90      | 2.1  | 0.214 |
| 1b2v | A   | 173     | 1.9  | 0.175 |
| 1b35 | B/D | 246/57  | 2.4  | 0.228 |
| 1b3q | B   | 243     | 2.6  | 0.213 |
| 1b3u | A   | 568     | 2.3  | 0.209 |
| 1b4a | A   | 122     | 2.5  | 0.224 |
| 1b4u | A/D | 132/295 | 2.2  | 0.161 |
| 1b5s | A   | 242     | 4.4  | N/A   |
| 1b63 | A   | 328     | 1.9  | 0.213 |
| 1b65 | A   | 363     | 1.82 | 0.169 |
| 1b67 | A   | 68      | 1.48 | 0.188 |
| 1b6z | A   | 138     | 2    | 0.216 |
| 1b8i | A   | 58      | 2.4  | 0.224 |
| 1b9n | A   | 242     | 2.09 | 0.214 |
| 1b9o | A   | 123     | 1.15 | 0.122 |
| 1b9w | A   | 87      | 1.8  | 0.212 |
| 1bal | A   | 51      | N/A  |       |
| 1baw | A   | 102     | 2.8  | 0.193 |
| 1bb1 | A   | 34      | 1.8  | 0.208 |
| 1bbg | A   | 40      | N/A  |       |
| 1bbh | A   | 131     | 1.8  | 0.185 |
| 1bbp | A   | 173     | 2    | 0.2   |
| 1bbu | A   | 375     | 2.7  | 0.228 |
| 1bc2 | A   | 208     | 1.9  | 0.208 |
| 1bcm | A   | 304     | 2.8  | 0.214 |
| 1bcp | D   | 110     | 2.7  | 0.232 |
| 1bd2 | D   | 159     | 2.5  | 0.238 |
| 1bd8 | A   | 156     | 1.8  | 0.19  |

|       |   |      |      |       |
|-------|---|------|------|-------|
| 1bdf  | B | 227  | 2.5  | 0.225 |
| 1bds  | A | 43   | N/A  |       |
| 1bed  | A | 171  | 2    | 0.205 |
| 1bei  | A | 34   | N/A  |       |
| 1bev  | 4 | 17   | 3    | 0.225 |
| 1bg1  | A | 331  | 2.25 | 0.246 |
| 1bg6  | A | 349  | 1.8  | 0.188 |
| 1bgc  | A | 157  | 1.7  | 0.213 |
| 1bgf  | A | 124  | 1.45 | 0.188 |
| 1bgk  | A | 37   | N/A  |       |
| 1bgp  | A | 308  | 1.9  | 0.192 |
| 1bgw  | A | 669  | 2.7  | 0.22  |
| 1bh7  | A | 31   | N/A  |       |
| 1bhg  | A | 611  | 2.53 | 0.231 |
| 1bht  | A | 171  | 2    | 0.196 |
| 1bhu  | A | 102  | N/A  |       |
| 1bi6  | H | 41   | N/A  |       |
| 1bi9  | D | 408  | 2.7  | 0.234 |
| 1kbk  | A | 132  | 1.75 | 0.214 |
| 1bkr  | A | 108  | 1.1  | 0.141 |
| 1ble  | A | 88   | 2.9  | 0.185 |
| 1blu  | A | 80   | 2.1  | 0.192 |
| 1bm4  | A | 32   | N/A  |       |
| 1bml  | D | 202  | 2.9  | 0.201 |
| 1bmw  | A | 94   | N/A  |       |
| 1bnz  | A | 64   | 2    | 0.168 |
| 1bo1  | A | 246  | 3    | 0.229 |
| 1bob  | A | 266  | 2.3  | 0.204 |
| 1bor  | A | 56   | N/A  |       |
| 1bpl  | A | 179  | 2.2  | 0.167 |
| 1bq9  | A | 53   | 1.2  | 0.137 |
| 1bqs  | A | 176  | 2.2  | 0.223 |
| 1bqu  | B | 215  | 2    | 0.221 |
| 1bqv  | A | 110  | N/A  |       |
| 1bs3  | A | 201  | 1.55 | 0.174 |
| 1bte  | B | 94   | 1.5  | 0.181 |
| 1bu8  | A | 446  | 1.8  | 0.202 |
| 1bus  | A | 56   | N/A  |       |
| 1bv8  | A | 138  | N/A  |       |
| 1bvs  | A | 140  | 3    | 0.274 |
| 1bw9  | A | 349  | 1.5  | 0.195 |
| 1bwx  | A | 39   | N/A  |       |
| 1bx4  | A | 342  | 1.5  | 0.192 |
| 1bx7  | A | 51   | 1.2  | 0.179 |
| 1bxo  | A | 108  | 1.9  | 0.189 |
| 1bxm  | A | 99   | 2.15 | 0.189 |
| 1bxr  | A | 1054 | 2.1  | 0.195 |
| 1bxy  | A | 59   | 1.9  | 0.203 |
| 1byh  | A | 214  | 2.8  | 0.168 |
| 1byl  | A | 122  | 2.3  | 0.176 |
| 1bzb  | A | 32   | N/A  |       |
| 1bzig | A | 34   | N/A  |       |

|      |     |         |      |       |
|------|-----|---------|------|-------|
| 1bzk | A   | 42      | N/A  |       |
| 1c0m | B   | 216     | 2.53 | 0.216 |
| 1c12 | A   | 209     | 2.6  | 0.205 |
| 1c1k | A   | 217     | 1.45 | 0.2   |
| 1c1z | A   | 276     | 2.87 | 0.238 |
| 1c2a | A   | 120     | 1.9  | 0.191 |
| 1c2u | A   | 33      | N/A  |       |
| 1c3c | A   | 424     | 1.8  | 0.179 |
| 1c3g | A   | 125     | 2.7  | 0.265 |
| 1c3z | A   | 108     | N/A  |       |
| 1c5e | A   | 95      | 1.1  | 0.099 |
| 1c6w | A   | 33      | N/A  |       |
| 1c7k | A   | 132     | 1    | 0.148 |
| 1c7t | A   | 858     | 1.9  | 0.191 |
| 1c7y | A   | 179     | 3.1  | 0.249 |
| 1cb7 | A/B | 137/483 | 2    | 0.16  |
| 1cbf | A   | 227     | 2.4  | 0.195 |
| 1ccz | A   | 161     | 1.8  | 0.202 |
| 1cd3 | 4/B | 135/54  | 3.5  | 0.275 |
| 1cd8 | A   | 113     | 2.6  | 0.192 |
| 1ce4 | A   | 14      | N/A  |       |
| 1cee | B   | 59      | N/A  |       |
| 1cew | I   | 104     | 2    | 0.198 |
| 1cf4 | B   | 44      | N/A  |       |
| 1cf7 | B   | 57      | 2.6  | 0.223 |
| 1cfb | A   | 205     | 2    | 0.202 |
| 1cfh | A   | 47      | N/A  |       |
| 1cfi | A   | 35      | N/A  |       |
| 1cfr | A   | 269     | 2.15 | 0.196 |
| 1cfz | A   | 159     | 2.2  | 0.224 |
| 1cg5 | B   | 141     | 1.6  | 0.191 |
| 1cgi | I   | 53      | 2.3  | 0.195 |
| 1chd | A   | 198     | 1.75 | 0.182 |
| 1ci3 | M   | 245     | 1.9  | 0.203 |
| 1ci6 | A   | 46      | 2.6  | 0.217 |
| 1cia | A   | 213     | 2.5  | 0.131 |
| 1cii | A   | 422     | 3    | 0.241 |
| 1ciy | A   | 567     | 2.25 | 0.163 |
| 1cke | A   | 207     | 1.75 | 0.205 |
| 1ckm | A   | 317     | 2.5  | 0.218 |
| 1cks | C   | 75      | 2.1  | 0.168 |
| 1cl4 | A   | 32      | N/A  |       |
| 1cm2 | A   | 85      | 1.8  | 0.2   |
| 1cmr | A   | 31      | N/A  |       |
| 1cnv | A   | 283     | 1.65 | 0.172 |
| 1cnz | A   | 344     | 1.76 | 0.198 |
| 1co0 | A   | 105     | N/A  |       |
| 1co4 | A   | 42      | N/A  |       |
| 1cof | A   | 131     | 2.3  | 0.184 |
| 1col | A   | 194     | 2.4  | 0.18  |
| 1cpc | A   | 162     | 1.66 | 0.181 |
| 1cpm | A   | 209     | 2    | 0.153 |

|      |     |         |      |       |
|------|-----|---------|------|-------|
| 1cq3 | A   | 224     | 1.85 | 0.213 |
| 1cqx | A   | 401     | 1.75 | 0.182 |
| 1cqy | A   | 99      | 1.95 | 0.181 |
| 1cs6 | A   | 354     | 1.8  | 0.226 |
| 1ct9 | A   | 496     | 2    | 0.197 |
| 1ctm | A   | 242     | 2.3  | 0.198 |
| 1cw6 | A   | 37      | N/A  |       |
| 1cwx | A   | 44      | N/A  |       |
| 1cxw | A   | 60      | N/A  |       |
| 1cyw | A   | 159     | 2.5  | 0.192 |
| 1cz0 | A   | 162     | 2.1  | 0.191 |
| 1czm | A   | 260     | 2    | 0.186 |
| 1czq | A   | 45      | 1.5  | 0.214 |
| 1d06 | A   | 130     | 1.4  | 0.224 |
| 1d0k | A   | 312     | 2.02 | 0.165 |
| 1d0q | A   | 102     | 1.71 | 0.204 |
| 1d1d | A   | 220     | N/A  |       |
| 1d2i | A   | 218     | 1.7  | 0.182 |
| 1d2o | A   | 179     | 2    | 0.212 |
| 1d2t | A   | 215     | 1.9  | 0.216 |
| 1d2z | C/D | 104/144 | 2    | 0.211 |
| 1d3c | A   | 686     | 1.78 | 0.22  |
| 1d3y | B   | 290     | 2    | 0.197 |
| 1d4v | A   | 78      | 2.2  | 0.221 |
| 1d5f | A   | 314     | 2.8  | 0.23  |
| 1d5t | A   | 433     | 1.04 | 0.172 |
| 1d5y | A   | 216     | 2.7  | 0.254 |
| 1d66 | A   | 57      | 2.7  | 0.23  |
| 1d6b | A   | 42      | N/A  |       |
| 1d6g | A   | 47      | N/A  |       |
| 1d7c | A   | 189     | 1.9  | 0.187 |
| 1d7p | M   | 158     | 1.5  | 0.205 |
| 1d8d | A   | 307     | 2    | 0.164 |
| 1d8h | A   | 232     | 2    | 0.229 |
| 1d9k | H   | 18      | 3.2  | 0.247 |
| 1dap | A   | 318     | 2.2  | 0.17  |
| 1daq | A   | 71      | N/A  |       |
| 1dbt | A   | 237     | 2.4  | 0.193 |
| 1dc1 | B   | 310     | 1.7  | 0.19  |
| 1dce | A   | 510     | 2    | 0.215 |
| 1dcq | A   | 270     | 2.1  | 0.213 |
| 1dd3 | A   | 128     | 2    | 0.226 |
| 1ddx | A   | 551     | 3    | 0.267 |
| 1ddz | A   | 479     | 2.2  | 0.208 |
| 1dev | B   | 31      | 2.2  | 0.218 |
| 1df7 | A   | 159     | 1.7  | 0.187 |
| 1df9 | A   | 177     | 2.1  | 0.199 |
| 1dfs | A   | 31      | N/A  |       |
| 1dfx | A   | 120     | 1.9  | 0.2   |
| 1dgz | A   | 37      | N/A  |       |
| 1di2 | A   | 67      | 1.9  | 0.228 |
| 1dip | A   | 77      | N/A  |       |

|       |     |         |      |       |
|-------|-----|---------|------|-------|
| 1dj0  | A   | 264     | 1.5  | 0.167 |
| 1dj7  | A/B | 109/73  | 1.6  | 0.238 |
| 1dj8  | A   | 75      | 2    | 0.209 |
| 1dk8  | A   | 147     | 1.57 | 0.172 |
| 1dkc  | A   | 38      | N/A  |       |
| 1dlq  | A   | 309     | 2.3  | 0.188 |
| 1dmd  | A   | 31      | N/A  |       |
| 1dmg  | A   | 166     | 1.7  | 0.208 |
| 1dml  | B   | 35      | 2.7  | 0.23  |
| 1dmt  | A   | 696     | 2.1  | 0.195 |
| 1dmu  | A   | 299     | 2.2  | 0.177 |
| 1dn1  | A   | 317     | 2.6  | 0.239 |
| 1dnw  | A/D | 104/465 | 1.9  | 0.197 |
| 1do6  | A   | 124     | 2    | 0.16  |
| 1dow  | B   | 31      | 1.8  | 0.2   |
| 1dox  | A   | 96      | N/A  |       |
| 1doz  | A   | 309     | 1.8  | 0.183 |
| 1dp3  | A   | 55      | N/A  |       |
| 1dp7  | P   | 76      | 1.5  | 0.192 |
| 1dq8  | A   | 397     | 2.1  | 0.199 |
| 1dqc  | A   | 73      | N/A  |       |
| 1dqg  | A   | 134     | 1.7  | 0.196 |
| 1dqu  | A   | 513     | 2.8  | 0.273 |
| 1ds1  | A   | 323     | 1.08 | 0.135 |
| 1dsv  | A   | 31      | N/A  |       |
| 1dsz  | B   | 84      | 1.7  | 0.198 |
| 1dt9  | A   | 41      | 2.7  | 0.246 |
| 1dto  | A   | 198     | 1.9  | 0.232 |
| 1dtp  | A   | 190     | 2.5  | 0.197 |
| 1dtv  | A   | 67      | N/A  |       |
| 1du2  | A   | 76      | N/A  |       |
| 1du5  | A   | 206     | 2.5  | 0.167 |
| 1dus  | A   | 192     | 1.8  | 0.188 |
| 1dvb  | A   | 190     | 1.9  | 0.199 |
| 1dvk  | B   | 149     | 2.15 | 0.203 |
| 1dvo  | A   | 152     | 2    | 0.197 |
| 1dw9  | A   | 152     | 1.65 | 0.15  |
| 1dwl  | A   | 59      | N/A  |       |
| 1dx5  | L   | 110     | 2.3  | 0.2   |
| 1dxg  | A   | 36      | 1.8  | 0.169 |
| 1dxj  | A   | 242     | 1.8  | 0.182 |
| 1dxy  | A   | 329     | 1.86 | 0.196 |
| 1dy2  | A   | 168     | 2    | 0.2   |
| 1dzb  | A   | 203     | 2    | 0.225 |
| 1E+08 | D   | 88      | N/A  |       |
| 1e0a  | B   | 46      | N/A  |       |
| 1e0b  | A   | 53      | 1.9  | 0.226 |
| 1e0c  | A   | 270     | 1.8  | 0.18  |
| 1e0f  | K   | 45      | 3.1  | 0.208 |
| 1e0g  | A   | 48      | N/A  |       |
| 1E+12 | A   | 239     | 1.8  | 0.237 |
| 1E+19 | A   | 313     | 1.5  | 0.183 |

|       |     |         |      |       |
|-------|-----|---------|------|-------|
| 1e1h  | D   | 164     | 1.8  | 0.196 |
| 1E+29 | A   | 135     | 1.21 | 0.149 |
| 1E+39 | A   | 568     | 1.8  | 0.181 |
| 1e3a  | B   | 558     | 1.8  | 0.158 |
| 1e3d  | B   | 537     | 1.8  | 0.167 |
| 1E+44 | B   | 90      | 2.4  | 0.192 |
| 1E+58 | A   | 246     | 1.25 | 0.121 |
| 1e5l  | A   | 392     | 2.4  | 0.222 |
| 1e5r  | B   | 192     | 2.3  | 0.225 |
| 1e5u  | I   | 187     | N/A  |       |
| 1e5x  | A   | 363     | 2.25 | 0.222 |
| 1e6b  | A   | 181     | 1.65 | 0.196 |
| 1e6i  | A   | 111     | 1.87 | 0.187 |
| 1e6y  | C/E | 246/433 | 1.6  | 0.16  |
| 1E+79 | I   | 2       | 2.4  | 0.225 |
| 1e7u  | A   | 705     | 2    | 0.254 |
| 1e8c  | B   | 483     | 2    | 0.202 |
| 1e8i  | A   | 108     | 1.95 | 0.248 |
| 1e8q  | A   | 46      | N/A  |       |
| 1e9g  | A   | 278     | 1.15 | 0.136 |
| 1e9k  | A   | 38      | N/A  |       |
| 1e9s  | A   | 413     | 2.5  | 0.209 |
| 1ea7  | A   | 307     | 0.93 | 0.097 |
| 1eab  | A   | 243     | 2.6  | 0.198 |
| 1eah  | 4   | 68      | 2.9  | 0.185 |
| 1eai  | C   | 61      | 2.4  | 0.191 |
| 1eb0  | A   | 139     | 1.85 | 0.22  |
| 1eb6  | A   | 177     | 1    | 0.104 |
| 1ebt  | A   | 142     | 1.9  | 0.184 |
| 1ecg  | B   | 474     | 2.3  | 0.147 |
| 1eci  | B   | 34      | N/A  |       |
| 1ecr  | A   | 287     | 2.7  | 0.196 |
| 1ecz  | A   | 140     | 2.68 | 0.195 |
| 1ed7  | A   | 45      | N/A  |       |
| 1edk  | A   | 56      | N/A  |       |
| 1eds  | A   | 31      | N/A  |       |
| 1edv  | A   | 34      | N/A  |       |
| 1edx  | A   | 40      | N/A  |       |
| 1ee8  | A   | 266     | 1.9  | 0.214 |
| 1eej  | A   | 201     | 1.9  | 0.214 |
| 1eem  | A   | 233     | 2    | 0.219 |
| 1eer  | A/B | 160/203 | 1.9  | 0.242 |
| 1ees  | B   | 46      | N/A  |       |
| 1efv  | A   | 309     | 2.1  | 0.172 |
| 1eg3  | A   | 259     | 2    | 0.194 |
| 1egm  | M   | 134     | 1.85 | 0.182 |
| 1ehd  | A   | 86      | 1.5  | 0.229 |
| 1ehs  | A   | 48      | N/A  |       |
| 1ei7  | A   | 132     | 2.45 | 0.195 |
| 1eia  | A   | 175     | 2.7  | 0.227 |
| 1eik  | A   | 77      | N/A  |       |
| 1eiy  | B   | 483     | 3.3  | 0.221 |

|      |     |         |      |       |
|------|-----|---------|------|-------|
| 1ej6 | D   | 417     | 3.6  | 0.206 |
| 1ej8 | A   | 139     | 1.55 | 0.196 |
| 1ejb | A   | 168     | 1.85 | 0.197 |
| 1ejf | A   | 110     | 2.49 | 0.236 |
| 1ekj | G   | 214     | 1.93 | 0.229 |
| 1ekr | A   | 83      | 2    | 0.219 |
| 1el6 | A   | 199     | 2    | 0.208 |
| 1elk | A   | 153     | 1.5  | 0.193 |
| 1elv | A   | 303     | 1.7  | 0.186 |
| 1em8 | D   | 111     | 2.1  | 0.229 |
| 1emw | A   | 88      | N/A  |       |
| 1en7 | A   | 130     | 2.4  | 0.239 |
| 1eo0 | A   | 77      | N/A  |       |
| 1eo6 | B   | 117     | 1.8  | 0.229 |
| 1eq2 | F   | 302     | 2    | 0.212 |
| 1eq6 | A   | 184     | 1.9  | 0.217 |
| 1eqf | A   | 248     | 2.1  | 0.218 |
| 1eqn | A   | 289     | 2.9  | 0.22  |
| 1es9 | A   | 207     | 1.3  | 0.192 |
| 1esx | A   | 96      | N/A  |       |
| 1eto | B   | 93      | 1.9  | 0.225 |
| 1eu1 | A   | 766     | 1.3  | 0.121 |
| 1eu3 | A   | 210     | 1.68 | 0.207 |
| 1euv | A   | 219     | 1.6  | 0.19  |
| 1ev0 | A   | 58      | N/A  |       |
| 1ewf | A   | 434     | 1.7  | 0.198 |
| 1ews | A   | 32      | N/A  |       |
| 1exk | A   | 79      | N/A  |       |
| 1ext | A   | 160     | 1.85 | 0.203 |
| 1eyf | A   | 92      | N/A  |       |
| 1eyr | A   | 211     | 2.2  | 0.185 |
| 1eys | C/H | 300/234 | 2.2  | 0.231 |
| 1eyv | B   | 133     | 1.6  | 0.19  |
| 1ez1 | A   | 388     | 1.75 | 0.189 |
| 1ezv | G   | 52      | 2.3  | 0.222 |
| 1ezw | A   | 315     | 1.65 | 0.198 |
| 1f00 | I   | 282     | 1.9  | 0.215 |
| 1f0i | A   | 496     | 1.4  | 0.13  |
| 1f0x | A   | 497     | 1.9  | 0.209 |
| 1f13 | A   | 657     | 2.1  | 0.183 |
| 1f1e | A   | 141     | 1.37 | 0.159 |
| 1f34 | B   | 131     | 2.45 | 0.218 |
| 1f39 | A   | 101     | 1.9  | 0.228 |
| 1f3l | A   | 313     | 2.03 | 0.209 |
| 1f3m | A   | 60      | 2.3  | 0.237 |
| 1f3u | F   | 128     | 1.7  | 0.225 |
| 1f5n | A   | 570     | 1.7  | 0.226 |
| 1f5v | A   | 240     | 1.7  | 0.189 |
| 1f6f | A   | 152     | 2.3  | 0.225 |
| 1f6v | A   | 91      | N/A  |       |
| 1f7t | A   | 116     | 1.8  | 0.196 |
| 1f7u | A   | 542     | 2.2  | 0.19  |

|      |   |     |      |       |
|------|---|-----|------|-------|
| 1f89 | A | 264 | 2.4  | 0.229 |
| 1f8p | A | 36  | N/A  |       |
| 1f9y | A | 156 | 0.89 | 0.112 |
| 1faz | A | 122 | 1.4  | 0.188 |
| 1fbm | A | 46  | 2.7  | 0.195 |
| 1fbv | A | 303 | 2.9  | 0.227 |
| 1fc3 | A | 118 | 2    | 0.196 |
| 1fct | A | 32  | N/A  |       |
| 1fcu | A | 319 | 2.1  | 0.2   |
| 1fd4 | A | 40  | 1.7  | 0.187 |
| 1fe6 | A | 52  | 1.8  | 0.198 |
| 1feu | D | 175 | 2.3  | 0.208 |
| 1ffq | A | 540 | 1.9  | 0.189 |
| 1fft | C | 163 | 3.5  | N/A   |
| 1fgj | A | 499 | 2.8  | 0.23  |
| 1fh1 | A | 37  | N/A  |       |
| 1fio | A | 184 | 2.1  | 0.219 |
| 1fiu | A | 286 | 1.6  | 0.173 |
| 1fj1 | E | 125 | 2.68 | 0.226 |
| 1fjg | Q | 76  | 3    | 0.221 |
| 1fjr | A | 160 | 2.3  | 0.212 |
| 1fk8 | A | 240 | 1.95 | 0.185 |
| 1fka | Q | 84  | 3.3  | 0.304 |
| 1fkm | A | 299 | 1.9  | 0.199 |
| 1flc | B | 60  | 3.2  | 0.223 |
| 1flm | A | 122 | 1.3  | 0.15  |
| 1fma | E | 142 | 1.58 | 0.172 |
| 1fmb | A | 101 | 1.8  | 0.136 |
| 1fmh | B | 31  | N/A  |       |
| 1fn9 | A | 365 | 1.8  | 0.169 |
| 1fne | A | 179 | 1.9  | 0.231 |
| 1fnh | A | 222 | 2.8  | 0.216 |
| 1fnm | A | 589 | 2.8  | 0.212 |
| 1fnt | E | 132 | 3.2  | 0.255 |
| 1fo1 | A | 131 | 2.9  | 0.25  |
| 1foa | A | 338 | 1.8  | 0.185 |
| 1fp0 | A | 88  | N/A  |       |
| 1fp1 | D | 334 | 1.82 | 0.226 |
| 1fpm | A | 540 | 3    | 0.266 |
| 1fpo | A | 170 | 1.8  | 0.216 |
| 1fqj | C | 38  | 2.02 | 0.233 |
| 1fr3 | A | 67  | 1.5  | 0.185 |
| 1fre | A | 39  | N/A  |       |
| 1fs0 | G | 212 | 2.1  | 0.216 |
| 1fs1 | A | 40  | 1.8  | 0.218 |
| 1fs7 | A | 470 | 1.6  | 0.18  |
| 1fsc | A | 61  | 2    | 0.188 |
| 1fsg | A | 233 | 1.05 | 0.122 |
| 1fsj | B | 134 | 1.8  | 0.189 |
| 1ft5 | A | 207 | 1.6  | 0.188 |
| 1ftr | A | 296 | 1.7  | 0.198 |
| 1fui | A | 585 | 2.5  | 0.162 |

|      |     |       |      |       |
|------|-----|-------|------|-------|
| 1fuk | A   | 156   | 1.75 | 0.221 |
| 1fv5 | A   | 36    | N/A  |       |
| 1fvl | A   | 70    | N/A  |       |
| 1fvn | A   | 35    | N/A  |       |
| 1fw9 | A   | 164   | 1.4  | 0.164 |
| 1fx2 | A   | 224   | 1.46 | 0.178 |
| 1fx7 | A   | 220   | 2    | 0.214 |
| 1fy2 | A   | 220   | 1.2  | 0.218 |
| 1fzp | B   | 103   | 2.95 | 0.22  |
| 1g1t | A   | 157   | 1.5  | 0.196 |
| 1g1z | A   | 31    | N/A  |       |
| 1g26 | A   | 31    | N/A  |       |
| 1g2b | A   | 59    | 1.12 | 0.148 |
| 1g2c | A/B | 31/28 | 2.3  | 0.233 |
| 1g2h | A   | 61    | N/A  |       |
| 1g2r | A   | 91    | 1.35 | 0.157 |
| 1g31 | A   | 83    | 2.3  | 0.225 |
| 1g38 | A   | 393   | 2    | 0.196 |
| 1g3j | B   | 29    | 2.1  | 0.229 |
| 1g3m | A   | 290   | 1.7  | 0.193 |
| 1g3t | A   | 170   | 2.35 | 0.238 |
| 1g4g | A   | 86    | N/A  |       |
| 1g55 | A   | 311   | 1.8  | 0.21  |
| 1g5g | A   | 304   | 3.3  | 0.224 |
| 1g60 | A   | 234   | 1.74 | 0.198 |
| 1g61 | A   | 225   | 1.3  | 0.132 |
| 1g65 | L   | 208   | 2.25 | 0.283 |
| 1g66 | A   | 205   | 0.9  | 0.107 |
| 1g6o | A   | 305   | 2.5  | 0.224 |
| 1g6s | A   | 427   | 1.5  | 0.149 |
| 1g6u | B   | 48    | 1.48 | 0.198 |
| 1g71 | A   | 344   | 2.3  | 0.211 |
| 1g7o | A   | 215   | N/A  |       |
| 1g87 | B   | 611   | 1.6  | 0.174 |
| 1g8a | A   | 227   | 1.4  | 0.203 |
| 1g8e | A   | 79    | 1.8  | 0.218 |
| 1g8k | A   | 822   | 1.64 | 0.154 |
| 1g8m | A   | 580   | 1.75 | 0.2   |
| 1g8p | A   | 295   | 2.1  | 0.214 |
| 1g8q | A   | 90    | 1.6  | 0.188 |
| 1g8t | A   | 240   | 1.1  | 0.129 |
| 1g96 | A   | 91    | 2.5  | 0.22  |
| 1g9l | A   | 144   | N/A  |       |
| 1g9p | A   | 45    | N/A  |       |
| 1ga1 | A   | 370   | 1.4  | 0.108 |
| 1gd0 | A   | 118   | 1.5  | 0.191 |
| 1gd8 | A   | 104   | 2.3  | 0.21  |
| 1gdt | A   | 179   | 3    | 0.235 |
| 1ger | B   | 449   | 1.86 | 0.168 |
| 1gff | 2   | 177   | 3    | 0.352 |
| 1ggq | A   | 134   | 2.51 | 0.231 |
| 1ggw | A   | 140   | N/A  |       |

|      |     |         |      |       |
|------|-----|---------|------|-------|
| 1ggx | A   | 216     | 1.9  | 0.192 |
| 1ggz | A   | 144     | 1.5  | 0.183 |
| 1gh9 | A   | 71      | N/A  |       |
| 1ghc | A   | 75      | N/A  |       |
| 1ghe | B   | 167     | 1.55 | 0.209 |
| 1gig | H   | 219     | 2.3  | 0.195 |
| 1gio | A   | 125     | N/A  |       |
| 1gjj | A   | 93      | N/A  |       |
| 1gk4 | A   | 71      | 2.3  | 0.242 |
| 1gk5 | A   | 49      | N/A  |       |
| 1gk7 | A   | 39      | 1.4  | 0.197 |
| 1gk8 | A   | 464     | 1.4  | 0.149 |
| 1gk9 | A   | 199     | 1.3  | 0.148 |
| 1gl0 | I   | 6       | 3    | 0.174 |
| 1gl2 | A/D | 54/55   | 1.9  | 0.176 |
| 1gl4 | B   | 89      | 2    | 0.217 |
| 1glg | A   | 309     | 2    | 0.167 |
| 1gme | A   | 127     | 2.7  | 0.231 |
| 1gmr | A   | 96      | 1.77 | 0.146 |
| 1gmu | C   | 140     | 1.5  | 0.223 |
| 1gmx | A   | 106     | 1.1  | 0.128 |
| 1gnf | A   | 46      | N/A  |       |
| 1go3 | E/F | 177/107 | 1.75 | 0.217 |
| 1go4 | G   | 16      | 2.05 | 0.24  |
| 1goa | A   | 156     | 1.9  | 0.194 |
| 1got | A   | 326     | 2    | 0.207 |
| 1gou | A   | 108     | 1.65 | 0.14  |
| 1gp0 | A   | 133     | 1.4  | 0.209 |
| 1gp8 | A   | 40      | N/A  |       |
| 1gpc | A   | 218     | 2.2  | 0.236 |
| 1gpj | A   | 367     | 1.95 | 0.212 |
| 1gq5 | A   | 91      | 2.2  | 0.222 |
| 1gqe | A   | 325     | 1.81 | 0.222 |
| 1gqy | B   | 466     | 1.8  | 0.184 |
| 1gr0 | A   | 328     | 1.95 | 0.211 |
| 1gri | A   | 194     | 3.1  | 0.213 |
| 1gru | L   | 267     | 12.5 | N/A   |
| 1gsa | A   | 314     | 2    | 0.188 |
| 1gsl | A   | 239     | 2    | 0.185 |
| 1gso | A   | 408     | 1.6  | 0.209 |
| 1gt0 | D   | 38      | 2.6  | 0.232 |
| 1guq | A   | 345     | 1.8  | 0.174 |
| 1gv8 | A   | 152     | 1.95 | 0.169 |
| 1gvj | B   | 139     | 1.53 | 0.208 |
| 1gvm | F   | 127     | 2.8  | 0.226 |
| 1gw6 | A   | 606     | 2.2  | 0.174 |
| 1gwe | A   | 491     | 0.88 | 0.089 |
| 1gx3 | A   | 274     | 1.7  | 0.209 |
| 1gxe | A   | 130     | N/A  |       |
| 1gxl | A   | 46      | 3    | 0.252 |
| 1gxs | D   | 158     | 2.3  | 0.165 |
| 1gxt | A   | 87      | 1.27 | 0.134 |

|      |   |     |      |       |
|------|---|-----|------|-------|
| 1gyo | A | 106 | 1.2  | 0.13  |
| 1gyx | A | 71  | 1.35 | 0.142 |
| 1gzs | B | 164 | 2.3  | 0.226 |
| 1h0a | A | 153 | 1.7  | 0.185 |
| 1h20 | A | 39  | N/A  |       |
| 1h21 | A | 239 | 2.5  | 0.199 |
| 1h2c | A | 125 | 1.6  | 0.164 |
| 1h2i | A | 157 | 2.7  | 0.225 |
| 1h31 | A | 260 | 2.55 | 0.21  |
| 1h3m | A | 213 | 2.4  | 0.237 |
| 1h3o | A | 43  | 2.3  | 0.226 |
| 1h4a | X | 172 | 1.15 | 0.155 |
| 1h4i | D | 73  | 1.94 | 0.199 |
| 1h4y | A | 115 | 1.61 | 0.159 |
| 1h6f | B | 186 | 1.7  | 0.201 |
| 1h6g | A | 217 | 2.2  | 0.193 |
| 1h6p | A | 170 | 2.2  | 0.235 |
| 1h6q | A | 168 | N/A  |       |
| 1h7d | A | 49  | N/A  |       |
| 1h8p | A | 88  | 1.82 | 0.207 |
| 1h97 | A | 147 | 1.17 | 0.121 |
| 1h99 | A | 220 | 1.55 | 0.224 |
| 1h9e | A | 56  | N/A  |       |
| 1h9h | I | 28  | 1.5  | 0.233 |
| 1h9j | A | 145 | 1.8  | 0.2   |
| 1h9t | A | 121 | 3.25 | 0.264 |
| 1ha8 | A | 51  | N/A  |       |
| 1har | A | 167 | 2.2  | 0.208 |
| 1hbq | A | 177 | 1.7  | 0.196 |
| 1hbw | A | 57  | N/A  |       |
| 1hcr | A | 34  | 2.3  | 0.228 |
| 1hdh | A | 524 | 1.3  | 0.199 |
| 1hdj | A | 77  | N/A  |       |
| 1hfe | L | 381 | 1.6  | 0.158 |
| 1hg0 | A | 327 | 1.9  | 0.171 |
| 1hhn | A | 101 | N/A  |       |
| 1hhv | A | 73  | N/A  |       |
| 1hi7 | A | 60  | N/A  |       |
| 1hix | E | 83  | 2.65 | 0.246 |
| 1hly | A | 39  | N/A  |       |
| 1hn0 | A | 962 | 1.9  | 0.156 |
| 1hn3 | A | 40  | N/A  |       |
| 1hn6 | A | 110 | N/A  |       |
| 1hns | A | 47  | N/A  |       |
| 1hnw | N | 21  | 3.4  | 0.222 |
| 1hnx | I | 17  | 3.4  | 0.232 |
| 1hof | A | 32  | N/A  |       |
| 1hp8 | A | 68  | N/A  |       |
| 1hpu | A | 521 | 1.85 | 0.207 |
| 1hpw | A | 129 | N/A  |       |
| 1hq0 | A | 290 | 1.83 | 0.191 |
| 1hq1 | A | 67  | 1.52 | 0.151 |

|      |   |     |      |       |
|------|---|-----|------|-------|
| 1hqi | A | 90  | N/A  |       |
| 1hqs | A | 407 | 1.55 | 0.202 |
| 1hr0 | J | 9   | 3.2  | 0.218 |
| 1hre | A | 67  | N/A  |       |
| 1hrt | I | 65  | 2.8  | 0.155 |
| 1hru | A | 181 | 2    | 0.202 |
| 1ht2 | G | 210 | 2.8  | 0.262 |
| 1ht9 | A | 76  | 1.76 | 0.162 |
| 1hth | A | 31  | N/A  |       |
| 1htr | P | 34  | 1.62 | 0.179 |
| 1htw | A | 153 | 1.7  | 0.199 |
| 1hu3 | A | 136 | 2.37 | 0.249 |
| 1hvy | A | 287 | 1.9  | 0.201 |
| 1hw5 | A | 191 | 1.82 | 0.228 |
| 1hxd | A | 280 | 2.4  | 0.189 |
| 1hxx | A | 245 | 1.22 | 0.146 |
| 1hxi | A | 108 | 1.6  | 0.186 |
| 1hxm | A | 174 | 3.12 | 0.219 |
| 1hxn | A | 203 | 1.8  | 0.176 |
| 1hy9 | A | 41  | N/A  |       |
| 1hyp | A | 73  | 1.8  | 0.187 |
| 1hyq | A | 206 | 2.6  | 0.206 |
| 1hyw | A | 58  | N/A  |       |
| 1hz4 | A | 356 | 1.45 | 0.189 |
| 1hz8 | A | 82  | N/A  |       |
| 1hza | A | 67  | 1.8  | 0.193 |
| 1hzd | A | 266 | 2.2  | 0.207 |
| 1hzf | A | 276 | 2.3  | 0.215 |
| 1hzm | A | 154 | N/A  |       |
| 1i19 | A | 540 | 1.7  | 0.182 |
| 1i1n | A | 224 | 1.5  | 0.183 |
| 1i1q | A | 483 | 1.9  | 0.219 |
| 1i1r | B | 124 | 2.4  | 0.213 |
| 1i1w | A | 299 | 0.89 | 0.09  |
| 1i25 | A | 37  | N/A  |       |
| 1i26 | A | 34  | N/A  |       |
| 1i27 | A | 73  | 1.02 | 0.126 |
| 1i2a | A | 211 | 1.85 | 0.222 |
| 1i2t | A | 61  | 1.04 | 0.143 |
| 1i39 | A | 199 | 1.95 | 0.244 |
| 1i3q | L | 4   | 3.1  | 0.229 |
| 1i51 | D | 67  | 2.45 | 0.233 |
| 1i5p | A | 628 | 2.2  | 0.183 |
| 1i6v | E | 41  | 3.3  | 0.276 |
| 1i72 | B | 61  | 2    | 0.201 |
| 1i7d | A | 499 | 2.05 | 0.233 |
| 1i7o | A | 412 | 1.7  | 0.251 |
| 1i7w | D | 20  | 2    | 0.206 |
| 1i7x | B | 19  | 3    | 0.196 |
| 1ia9 | B | 242 | 2    | 0.24  |
| 1iaw | A | 283 | 2.4  | 0.243 |
| 1ib9 | A | 34  | N/A  |       |

|      |     |         |      |       |
|------|-----|---------|------|-------|
| 1iba | A   | 78      | N/A  |       |
| 1ibm | S   | 9       | 3.31 | 0.231 |
| 1ibw | A   | 75      | 3.2  | 0.204 |
| 1ibx | B   | 89      | N/A  |       |
| 1icf | B   | 41      | 2    | 0.182 |
| 1id0 | A   | 133     | 1.6  | 0.199 |
| 1idu | A   | 566     | 2.24 | 0.177 |
| 1ie0 | A   | 154     | 1.6  | 0.174 |
| 1ie5 | A   | 107     | N/A  |       |
| 1ie6 | A   | 33      | N/A  |       |
| 1ie9 | A   | 255     | 1.4  | 0.214 |
| 1ied | A   | 200     | 2    | 0.226 |
| 1iez | A   | 217     | N/A  |       |
| 1ifl | A   | 53      | 5    | N/A   |
| 1ig0 | B   | 319     | 1.8  | 0.217 |
| 1ig4 | A   | 75      | N/A  |       |
| 1igl | A   | 67      | N/A  |       |
| 1ihm | B   | 463     | 3.4  | 0.26  |
| 1ihn | A   | 107     | 2.2  | 0.228 |
| 1iho | A   | 282     | 1.7  | 0.211 |
| 1iie | A   | 75      | N/A  |       |
| 1iij | A   | 35      | N/A  |       |
| 1iio | A   | 84      | N/A  |       |
| 1ij6 | A   | 269     | 3.1  | 0.249 |
| 1ija | A   | 148     | N/A  |       |
| 1ijf | A   | 440     | 3    | 0.25  |
| 1ijg | A   | 223     | 2.9  | 0.224 |
| 1ijy | A   | 122     | 1.35 | 0.225 |
| 1ijz | A   | 113     | N/A  |       |
| 1ik9 | A   | 126     | 2.3  | 0.228 |
| 1iko | P   | 138     | 1.92 | 0.216 |
| 1ikp | A   | 586     | 1.45 | 0.205 |
| 1im2 | A   | 269     | 2.8  | 0.233 |
| 1io0 | A   | 166     | 1.45 | 0.203 |
| 1iod | G   | 32      | 2.3  | 0.201 |
| 1ioj | A   | 57      | N/A  |       |
| 1iom | A   | 369     | 1.5  | 0.172 |
| 1ip0 | A   | 50      | N/A  |       |
| 1ipb | A   | 191     | 2    | 0.196 |
| 1iq4 | A   | 173     | 1.8  | 0.215 |
| 1iqc | A   | 308     | 1.8  | 0.222 |
| 1iqq | A   | 200     | 1.5  | 0.172 |
| 1iqs | A   | 88      | N/A  |       |
| 1iqv | A   | 152     | 2.1  | 0.196 |
| 1iqz | A   | 81      | 0.92 | 0.097 |
| 1ir6 | A   | 223     | 2.9  | 0.228 |
| 1irq | B   | 45      | 1.5  | 0.211 |
| 1iru | V/X | 173/153 | 2.75 | 0.25  |
| 1irx | B   | 325     | 2.6  | 0.225 |
| 1is2 | A   | 635     | 2.2  | 0.209 |
| 1isu | A   | 62      | 1.5  | 0.173 |
| 1it8 | A   | 574     | 2.5  | 0.232 |

|      |     |         |      |       |
|------|-----|---------|------|-------|
| 1itv | A   | 187     | 1.95 | 0.229 |
| 1iu4 | A   | 329     | 2.4  | 0.199 |
| 1iua | A   | 83      | 0.8  | 0.092 |
| 1iuh | A   | 181     | 2.5  | 0.198 |
| 1iv3 | A   | 150     | 1.52 | 0.202 |
| 1ivz | A   | 132     | N/A  |       |
| 1iw1 | A   | 212     | 1.5  | 0.177 |
| 1iw7 | C/D | 607/823 | 2.6  | 0.228 |
| 1iwf | A   | 34      | N/A  |       |
| 1iwg | A   | 301     | 3.5  | 0.29  |
| 1iwl | A   | 177     | 1.65 | 0.222 |
| 1iwp | E   | 184     | 2.1  | 0.209 |
| 1ix5 | A   | 151     | N/A  |       |
| 1ixa | A   | 39      | N/A  |       |
| 1ixk | A   | 298     | 1.9  | 0.199 |
| 1iyc | A   | 36      | N/A  |       |
| 1iyj | A   | 32      | 3.4  | 0.244 |
| 1izl | Y/Z | 192/91  | 3.7  | 0.53  |
| 1izm | A   | 156     | 1.95 | 0.194 |
| 1izn | A   | 176     | 2.1  | 0.222 |
| 1j0b | S   | 312     | 2.7  | 0.291 |
| 1j1e | F   | 60      | 3.3  | 0.251 |
| 1j1v | A   | 92      | 2.1  | 0.229 |
| 1j25 | A   | 133     | 1.78 | 0.228 |
| 1j26 | A   | 112     | N/A  |       |
| 1j27 | A   | 93      | 1.7  | 0.178 |
| 1j2m | A   | 99      | N/A  |       |
| 1j2r | A   | 188     | 1.3  | 0.145 |
| 1j30 | A   | 141     | 1.7  | 0.192 |
| 1j31 | A   | 255     | 1.6  | 0.166 |
| 1j34 | C   | 34      | 1.55 | 0.183 |
| 1j3a | A   | 129     | 1.6  | 0.209 |
| 1j3g | A   | 187     | N/A  |       |
| 1j3m | A   | 127     | 2    | 0.194 |
| 1j3w | B   | 135     | 1.5  | 0.208 |
| 1j3x | A   | 77      | N/A  |       |
| 1j4n | A   | 215     | 2.2  | 0.266 |
| 1j5p | A   | 226     | 1.9  | 0.224 |
| 1j5s | A   | 406     | 2.85 | 0.234 |
| 1j5u | A   | 125     | 2    | 0.212 |
| 1j6r | A   | 168     | 2.3  | 0.251 |
| 1j6u | A   | 395     | 2.3  | 0.234 |
| 1j70 | A   | 473     | 2.3  | 0.21  |
| 1j7x | A   | 288     | 1.8  | 0.205 |
| 1j8b | A   | 81      | 1.75 | 0.18  |
| 1j8f | A   | 312     | 1.7  | 0.235 |
| 1j8i | A   | 93      | N/A  |       |
| 1j9j | A   | 242     | 1.9  | 0.203 |
| 1ja1 | A   | 599     | 1.8  | 0.208 |
| 1jad | A   | 207     | 2.4  | 0.254 |
| 1jat | B   | 128     | 1.6  | 0.203 |
| 1jax | A   | 205     | 1.8  | 0.185 |

|      |         |                |      |       |
|------|---------|----------------|------|-------|
| 1jb0 | B/D/F/J | 664/135/110/20 | 2.5  | 0.199 |
| 1jb6 | A       | 31             | 1.7  | 0.231 |
| 1jbi | A       | 100            | N/A  |       |
| 1jc6 | A       | 65             | N/A  |       |
| 1jc9 | A       | 220            | 2.01 | 0.183 |
| 1jch | A       | 282            | 3.02 | 0.237 |
| 1jcz | A       | 260            | 1.55 | 0.194 |
| 1jd2 | H       | 219            | 3    | 0.251 |
| 1jdb | F       | 376            | 2.1  | 0.179 |
| 1jdh | B       | 36             | 1.9  | 0.203 |
| 1jdm | A       | 31             | N/A  |       |
| 1je5 | B       | 172            | 1.9  | 0.221 |
| 1jei | A       | 53             | N/A  |       |
| 1jej | A       | 351            | 2.5  | 0.197 |
| 1jek | A/B     | 40/34          | 1.5  | 0.213 |
| 1jeq | A       | 441            | 2.7  | 0.222 |
| 1jeu | A       | 513            | 1.25 | 0.224 |
| 1jey | B       | 490            | 2.5  | 0.218 |
| 1jfi | B       | 87             | 2.62 | 0.233 |
| 1jfl | A       | 228            | 1.9  | 0.194 |
| 1jfr | A       | 260            | 1.9  | 0.14  |
| 1jft | A       | 325            | 2.5  | 0.192 |
| 1jfw | A       | 86             | N/A  |       |
| 1jfx | A       | 217            | 1.65 | 0.152 |
| 1jg9 | A       | 628            | 1.66 | 0.185 |
| 1jgt | B       | 498            | 1.95 | 0.195 |
| 1jh7 | A       | 125            | 2.4  | 0.214 |
| 1jh8 | A       | 346            | 1.8  | 0.175 |
| 1jhf | A       | 197            | 1.8  | 0.24  |
| 1jhn | A       | 230            | 2.9  | 0.327 |
| 1ji7 | C       | 80             | 1.45 | 0.184 |
| 1ji8 | A       | 111            | N/A  |       |
| 1ji9 | A       | 37             | N/A  |       |
| 1jid | A       | 114            | 1.8  | 0.186 |
| 1jj2 | J       | 129            | 2.4  | 0.189 |
| 1jld | A       | 52             | N/A  |       |
| 1jjo | A       | 40             | 3.06 | 0.232 |
| 1jke | A       | 145            | 1.55 | 0.209 |
| 1jkv | A       | 266            | 1.39 | 0.104 |
| 1jl2 | A       | 150            | 1.76 | 0.249 |
| 1jm1 | A       | 197            | 1.11 | 0.106 |
| 1jm7 | B       | 97             | N/A  |       |
| 1jma | A       | 247            | 2.65 | 0.236 |
| 1jmm | A       | 356            | 2.4  | 0.207 |
| 1jms | A       | 346            | 2.36 | 0.214 |
| 1jmu | A/F     | 23/472         | 2.8  | 0.216 |
| 1jmv | A       | 140            | 1.85 | 0.22  |
| 1jmz | G       | 76             | 2    | 0.215 |
| 1jni | A       | 64             | 1.25 | 0.16  |
| 1jnp | A       | 100            | 2.5  | 0.196 |
| 1jnr | B       | 148            | 1.6  | 0.18  |
| 1jo0 | A       | 97             | 1.37 | 0.138 |

|      |   |     |      |       |
|------|---|-----|------|-------|
| 1jo6 | A | 45  | N/A  |       |
| 1joo | A | 149 | N/A  |       |
| 1jos | A | 98  | 1.7  | 0.216 |
| 1jou | C | 38  | 1.8  | 0.222 |
| 1jp3 | A | 210 | 1.8  | 0.194 |
| 1jpd | X | 278 | 2.6  | 0.209 |
| 1jq3 | A | 295 | 1.8  | 0.196 |
| 1jqn | A | 744 | 2.35 | 0.195 |
| 1jr3 | A | 108 | 2.7  | 0.268 |
| 1jr5 | A | 90  | N/A  |       |
| 1jrf | A | 47  | N/A  |       |
| 1jrm | A | 104 | N/A  |       |
| 1jrr | A | 357 | 1.6  | 0.197 |
| 1js8 | A | 382 | 2.3  | 0.202 |
| 1jsd | B | 160 | 1.8  | 0.218 |
| 1jsm | A | 316 | 1.9  | 0.234 |
| 1jsu | C | 60  | 2.3  | 0.192 |
| 1jtg | B | 165 | 1.73 | 0.173 |
| 1jv1 | A | 490 | 1.9  | 0.183 |
| 1jv2 | A | 660 | 3.1  | 0.255 |
| 1jv8 | A | 58  | N/A  |       |
| 1jvr | A | 137 | N/A  |       |
| 1jvw | A | 160 | 1.7  | 0.179 |
| 1jw2 | A | 72  | N/A  |       |
| 1jw9 | B | 239 | 1.7  | 0.175 |
| 1jwh | D | 80  | 3.1  | 0.267 |
| 1jwq | A | 179 | 1.8  | 0.176 |
| 1jx1 | D | 203 | 2.3  | 0.23  |
| 1jxc | A | 68  | N/A  |       |
| 1jxy | A | 46  | 0.89 | 0.145 |
| 1jy2 | O | 49  | 1.4  | 0.216 |
| 1jyh | A | 155 | 1.8  | 0.196 |
| 1jyo | F | 81  | 1.9  | 0.224 |
| 1k0h | A | 117 | N/A  |       |
| 1k0m | B | 236 | 1.4  | 0.138 |
| 1k0r | A | 219 | 1.7  | 0.248 |
| 1k1f | A | 63  | 2.2  | 0.262 |
| 1k20 | A | 310 | 1.5  | 0.175 |
| 1k24 | A | 178 | 2.03 | 0.235 |
| 1k28 | D | 42  | 2.9  | 0.211 |
| 1k2a | A | 136 | 1    | 0.132 |
| 1k2f | A | 153 | 2.6  | 0.22  |
| 1k2x | B | 135 | 1.65 | 0.163 |
| 1k2y | X | 459 | 1.75 | 0.168 |
| 1k30 | A | 363 | 1.9  | 0.186 |
| 1k36 | A | 46  | N/A  |       |
| 1k4i | A | 216 | 0.98 | 0.178 |
| 1k4n | A | 180 | 1.6  | 0.199 |
| 1k4t | A | 509 | 2.1  | 0.229 |
| 1k4u | P | 32  | N/A  |       |
| 1k51 | A | 72  | 1.8  | 0.186 |
| 1k5c | A | 330 | 0.96 | 0.114 |

|       |     |       |      |       |
|-------|-----|-------|------|-------|
| 1k5k  | A   | 87    | N/A  |       |
| 1k7v  | A   | 170   | 2.2  | 0.232 |
| 1k7y  | A   | 458   | 3    | 0.218 |
| 1k81  | A   | 36    | N/A  |       |
| 1k87  | A   | 440   | 2    | 0.208 |
| 1k8a  | U   | 54    | 3    | 0.227 |
| 1k8h  | A   | 133   | N/A  |       |
| 1k8k  | G   | 102   | 2    | 0.216 |
| 1k8v  | A   | 39    | N/A  |       |
| 1k8w  | A   | 293   | 1.85 | 0.184 |
| 1k92  | A   | 421   | 1.6  | 0.163 |
| 1k9m  | 3   | 29    | 3    | 0.219 |
| 1k9u  | A   | 69    | 1.75 | 0.192 |
| 1ka1  | A   | 354   | 1.3  | 0.133 |
| 1kaf  | A   | 108   | 1.6  | 0.226 |
| 1kat  | V   | 99    | N/A  |       |
| 1kb0  | A   | 663   | 1.44 | 0.16  |
| 1kb9  | D   | 180   | 2.3  | 0.218 |
| 1kbe  | A   | 49    | N/A  |       |
| 1kbh  | A/B | 47/59 | N/A  |       |
| 1kbl  | A   | 848   | 1.94 | 0.195 |
| 1kbt  | A   | 60    | N/A  |       |
| 1kc8  | O   | 94    | 3.01 | 0.195 |
| 1kcq  | A   | 104   | 1.65 | 0.177 |
| 1kd1  | N   | 138   | 3    | 0.22  |
| 1kdj  | A   | 102   | 1.7  | 0.234 |
| 1keo  | A   | 142   | 2.2  | 0.215 |
| 1key  | A   | 118   | 2.65 | 0.247 |
| 1kft  | A   | 56    | N/A  |       |
| 1kfu  | L   | 699   | 2.5  | 0.221 |
| 1kg1  | A   | 60    | N/A  |       |
| 1kgd  | A   | 170   | 1.31 | 0.186 |
| 1kgs  | A   | 208   | 1.5  | 0.179 |
| 1khc  | A   | 137   | 1.8  | 0.19  |
| 1khx  | A   | 201   | 1.8  | 0.215 |
| 1khy  | D   | 136   | 1.95 | 0.222 |
| 1khz  | A   | 203   | 2.04 | 0.196 |
| 1kil  | E   | 8     | 2.3  | 0.245 |
| 1kjs  | A   | 74    | N/A  |       |
| 1k jy | B   | 20    | 2.7  | 0.238 |
| 1kkd  | A   | 92    | N/A  |       |
| 1kl9  | A   | 165   | 1.9  | 0.198 |
| 1klx  | A   | 132   | 1.95 | 0.187 |
| 1kn3  | A   | 180   | 1.8  | 0.21  |
| 1kn7  | A   | 75    | N/A  |       |
| 1knm  | A   | 129   | 1.2  | 0.123 |
| 1knv  | B   | 281   | 2.17 | 0.218 |
| 1kny  | A   | 253   | 2.5  | 0.168 |
| 1knz  | A   | 154   | 2.45 | 0.228 |
| 1ko6  | A   | 152   | 3    | 0.247 |
| 1ko7  | A   | 280   | 1.95 | 0.226 |
| 1koo  | C   | 96    | 3.8  | 0.317 |

|      |   |     |      |       |
|------|---|-----|------|-------|
| 1kp6 | A | 79  | 1.8  | 0.164 |
| 1kp8 | A | 258 | 2    | 0.243 |
| 1kpl | D | 138 | 3    | 0.254 |
| 1kpt | A | 104 | 1.75 | 0.174 |
| 1kq1 | H | 66  | 1.55 | 0.237 |
| 1kq3 | A | 364 | 1.5  | 0.173 |
| 1kq6 | A | 127 | 1.18 | 0.132 |
| 1kqf | B | 283 | 1.6  | 0.177 |
| 1kqg | C | 135 | 2.8  | 0.198 |
| 1kql | A | 30  | 2.7  | 0.252 |
| 1kqq | A | 131 | N/A  |       |
| 1kqs | X | 137 | 3.1  | 0.173 |
| 1kqw | A | 134 | 1.38 | 0.159 |
| 1kr4 | A | 107 | 1.4  | 0.218 |
| 1krh | A | 337 | 1.5  | 0.241 |
| 1ksf | X | 684 | 2.6  | 0.216 |
| 1ksq | A | 75  | N/A  |       |
| 1kta | A | 365 | 1.9  | 0.24  |
| 1kth | A | 58  | 0.95 | 0.136 |
| 1ktu | A | 143 | N/A  |       |
| 1ktw | A | 456 | 2    | 0.203 |
| 1kv4 | A | 42  | N/A  |       |
| 1kvd | A | 63  | 1.8  | 0.186 |
| 1kve | B | 77  | 1.8  | 0.172 |
| 1kw4 | A | 68  | 1.75 | 0.22  |
| 1kwa | A | 88  | 1.93 | 0.251 |
| 1kwf | A | 358 | 0.94 | 0.094 |
| 1kwh | A | 492 | 2    | 0.185 |
| 1kwk | A | 638 | 2.2  | 0.169 |
| 1kwm | A | 401 | 1.6  | 0.136 |
| 1kwn | A | 207 | 1.2  | 0.127 |
| 1kyo | N | 381 | 2.97 | 0.229 |
| 1kyq | B | 249 | 2.2  | 0.219 |
| 1l0l | F | 105 | 2.35 | 0.259 |
| 1l0n | I | 22  | 2.6  | 0.261 |
| 1l0o | C | 51  | 2.9  | 0.221 |
| 1l0q | A | 385 | 2.4  | 0.214 |
| 1l1c | A | 55  | N/A  |       |
| 1l1d | B | 143 | 1.85 | 0.207 |
| 1l1i | A | 84  | N/A  |       |
| 1l1l | A | 710 | 1.75 | 0.223 |
| 1l1o | C | 75  | 2.8  | 0.236 |
| 1l1p | A | 106 | N/A  |       |
| 1l1s | A | 108 | 2.3  | 0.202 |
| 1l2f | A | 244 | 2.5  | 0.223 |
| 1l2l | A | 432 | 2    | 0.213 |
| 1l2p | A | 61  | 1.55 | 0.282 |
| 1l2w | I | 36  | 2    | 0.251 |
| 1l3a | C | 140 | 2.3  | 0.216 |
| 1l3g | A | 123 | N/A  |       |
| 1l3x | A | 73  | N/A  |       |
| 1l3y | A | 41  | N/A  |       |

|      |   |     |      |       |
|------|---|-----|------|-------|
| 114v | A | 40  | N/A  |       |
| 115i | A | 118 | N/A  |       |
| 116h | A | 69  | N/A  |       |
| 116p | A | 116 | 1.65 | 0.139 |
| 118c | B | 51  | N/A  |       |
| 118d | A | 101 | 2.2  | 0.225 |
| 118t | A | 246 | 2.4  | 0.234 |
| 119g | A | 190 | 2.5  | 0.226 |
| 119l | A | 74  | 0.92 | 0.137 |
| 119m | B | 665 | 2.1  | 0.182 |
| 119v | A | 251 | 2.6  | 0.241 |
| 119x | B | 291 | 1.6  | 0.181 |
| 11a4 | A | 34  | N/A  |       |
| 11b6 | A | 155 | 1.8  | 0.203 |
| 11bu | A | 212 | 1.8  | 0.164 |
| 11c3 | A | 292 | 1.5  | 0.214 |
| 11cp | A | 484 | 1.65 | 0.16  |
| 11dj | A | 224 | 3    | 0.247 |
| 11f7 | A | 164 | 1.2  | 0.223 |
| 11fp | A | 216 | 1.72 | 0.228 |
| 11fw | A | 468 | 1.8  | 0.174 |
| 11g4 | A | 99  | N/A  |       |
| 11g7 | A | 160 | 1.96 | 0.208 |
| 11gh | A | 55  | 2.4  | 0.211 |
| 11gy | A | 265 | 2.2  | 0.186 |
| 11h0 | A | 205 | 2    | 0.205 |
| 11hs | A | 153 | 2    | 0.182 |
| 11i1 | F | 225 | 1.9  | 0.182 |
| 11jp | A | 98  | 1.8  | 0.198 |
| 11ju | A | 122 | 1.4  | 0.241 |
| 11jv | A | 36  | N/A  |       |
| 11k9 | B | 427 | 1.53 | 0.193 |
| 11kt | A | 104 | 2.6  | 0.199 |
| 11kv | X | 206 | 2.8  | 0.255 |
| 11kx | C | 495 | 3    | 0.228 |
| 11lm | C | 83  | 1.5  | 0.216 |
| 11lr | F | 103 | 1.46 | 0.149 |
| 11m4 | A | 189 | 1.45 | 0.17  |
| 11m5 | B | 193 | 1.8  | 0.203 |
| 11m8 | V | 142 | 1.85 | 0.196 |
| 11mi | A | 130 | 1.5  | 0.197 |
| 11mj | A | 86  | N/A  |       |
| 11ml | A | 464 | 1.86 | 0.191 |
| 11mp | A | 129 | 2    | 0.159 |
| 11ns | A | 763 | 2.2  | 0.184 |
| 11om | A | 101 | 1.72 | 0.267 |
| 11pv | A | 52  | N/A  |       |
| 11qk | A | 131 | 1.35 | 0.143 |
| 11qs | M | 123 | 2.7  | 0.244 |
| 11r1 | A | 57  | N/A  |       |
| 11r9 | A | 73  | 2.5  | 0.22  |
| 11rl | A | 336 | 1.8  | 0.194 |

|      |   |     |      |       |
|------|---|-----|------|-------|
| 1lr  | A | 219 | 2.6  | 0.204 |
| 1ls3 | A | 434 | 2.7  | 0.22  |
| 1lsh | A | 880 | 1.9  | 0.193 |
| 1lsl | A | 97  | 1.9  | 0.238 |
| 1lsp | A | 185 | 2.45 | 0.175 |
| 1ltl | E | 180 | 3    | 0.245 |
| 1lu4 | A | 130 | 1.12 | 0.153 |
| 1lua | A | 282 | 1.9  | 0.185 |
| 1luj | B | 67  | 2.5  | 0.21  |
| 1lup | A | 31  | N/A  |       |
| 1lv3 | A | 65  | N/A  |       |
| 1lv7 | A | 248 | 1.5  | 0.154 |
| 1lvo | D | 275 | 1.96 | 0.21  |
| 1lw1 | A | 171 | 2.3  | 0.184 |
| 1lyq | B | 96  | 1.5  | 0.216 |
| 1lyv | A | 283 | 1.36 | 0.129 |
| 1m0v | A | 130 | N/A  |       |
| 1m0w | A | 454 | 1.8  | 0.172 |
| 1m1c | A | 438 | 3.5  | 0.266 |
| 1m1f | A | 107 | 1.4  | 0.16  |
| 1m1h | A | 182 | 1.95 | 0.234 |
| 1m1l | A | 228 | 2.65 | 0.224 |
| 1m1r | A | 82  | 1.02 | 0.149 |
| 1m1s | A | 107 | 1.8  | 0.278 |
| 1m21 | A | 487 | 1.8  | 0.203 |
| 1m2o | A | 683 | 2.5  | 0.238 |
| 1m3e | B | 451 | 2.5  | 0.221 |
| 1m3q | A | 311 | 1.9  | 0.235 |
| 1m3y | A | 413 | 2    | 0.342 |
| 1m46 | A | 141 | 2.1  | 0.199 |
| 1m4d | A | 181 | 1.8  | 0.174 |
| 1m4j | A | 133 | 1.6  | 0.232 |
| 1m56 | A | 544 | 2.3  | 0.236 |
| 1m5q | W | 125 | 2    | 0.191 |
| 1m5y | D | 278 | 3    | 0.228 |
| 1m6e | X | 239 | 3    | 0.225 |
| 1m6y | A | 286 | 1.9  | 0.197 |
| 1m6z | A | 190 | 1.35 | 0.14  |
| 1m7v | A | 340 | 1.95 | 0.225 |
| 1m8a | A | 56  | 1.7  | 0.193 |
| 1m93 | A | 46  | 1.65 | 0.188 |
| 1m98 | A | 316 | 2.1  | 0.215 |
| 1m9d | D | 146 | 1.9  | 0.163 |
| 1m9g | A | 97  | N/A  |       |
| 1m9o | A | 40  | N/A  |       |
| 1m9s | A | 128 | 2.65 | 0.273 |
| 1mb4 | A | 369 | 1.84 | 0.192 |
| 1mb8 | A | 243 | 2.15 | 0.212 |
| 1mby | A | 75  | 2    | 0.231 |
| 1mdr | A | 357 | 2.1  | 0.151 |
| 1me3 | A | 215 | 1.2  | 0.103 |
| 1mec | 4 | 62  | 3.2  | N/A   |

|      |   |     |      |       |
|------|---|-----|------|-------|
| 1meo | A | 202 | 1.72 | 0.223 |
| 1mex | L | 213 | 1.25 | 0.153 |
| 1mg7 | B | 352 | 1.55 | 0.204 |
| 1mgt | A | 169 | 1.8  | 0.171 |
| 1mgx | A | 35  | N/A  |       |
| 1mhm | B | 53  | 2.3  | 0.218 |
| 1mhs | A | 912 | 8    |       |
| 1mhz | D | 510 | 2.7  | 0.152 |
| 1mid | A | 90  | 1.71 | 0.163 |
| 1miu | A | 38  | 3.1  | 0.256 |
| 1mix | A | 206 | 1.75 | 0.199 |
| 1mj4 | A | 80  | 1.2  | 0.118 |
| 1mjh | B | 137 | 1.7  | 0.21  |
| 1mkc | A | 43  | N/A  |       |
| 1mkn | A | 59  | N/A  |       |
| 1mky | A | 400 | 1.9  | 0.204 |
| 1mkz | B | 169 | 1.6  | 0.183 |
| 1ml4 | A | 307 | 1.8  | 0.172 |
| 1ml8 | A | 130 | 2.6  | 0.228 |
| 1ml9 | A | 246 | 1.98 | 0.205 |
| 1mla | A | 305 | 1.5  | 0.184 |
| 1mlw | A | 290 | 1.71 | 0.205 |
| 1mm2 | A | 61  | N/A  |       |
| 1mm9 | A | 126 | 1.66 | 0.133 |
| 1mms | A | 71  | 2.57 | 0.219 |
| 1mn8 | D | 97  | 1    | 0.133 |
| 1mnm | A | 78  | 2.25 | 0.24  |
| 1mnn | A | 290 | 1.4  | 0.195 |
| 1mo1 | A | 84  | 1.8  | 0.164 |
| 1mo8 | A | 213 | N/A  |       |
| 1mof | A | 53  | 1.7  | 0.169 |
| 1mog | A | 67  | 1.7  | 0.18  |
| 1mpe | A | 56  | N/A  |       |
| 1mph | A | 106 | N/A  |       |
| 1mpz | A | 41  | N/A  |       |
| 1mqq | A | 674 | 1.65 | 0.185 |
| 1mr4 | A | 47  | N/A  |       |
| 1msw | D | 365 | 2.1  | 0.241 |
| 1mtp | B | 35  | 1.5  | 0.195 |
| 1mu2 | A | 453 | 2.35 | 0.192 |
| 1mus | A | 449 | 1.9  | 0.191 |
| 1mv4 | A | 37  | N/A  |       |
| 1mw5 | A | 151 | 2.1  | 0.196 |
| 1mwk | A | 304 | 2.3  | 0.217 |
| 1mwp | A | 96  | 1.8  | 0.203 |
| 1mwq | A | 99  | 0.99 | 0.108 |
| 1mx0 | C | 461 | 2.3  | 0.214 |
| 1mx9 | L | 450 | 2.9  | 0.214 |
| 1mz8 | A | 87  | 2    | 0.183 |
| 1mzb | A | 132 | 1.8  | 0.226 |
| 1mzg | A | 140 | 2    | 0.208 |
| 1mzw | B | 31  | 2    | 0.195 |

|      |     |        |      |       |
|------|-----|--------|------|-------|
| 1n07 | B   | 140    | 2.45 | 0.228 |
| 1n0e | F   | 148    | 2.7  | 0.231 |
| 1n0r | A   | 126    | 1.5  | 0.216 |
| 1n0w | A/B | 201/32 | 1.7  | 0.191 |
| 1n1c | A   | 179    | 2.4  | 0.224 |
| 1n26 | A   | 247    | 2.4  | 0.22  |
| 1n2d | C   | 45     | 2    | 0.208 |
| 1n2m | C   | 162    | 1.9  | 0.186 |
| 1n3h | A   | 207    | N/A  |       |
| 1n3j | A   | 119    | N/A  |       |
| 1n3l | A   | 317    | 1.18 | 0.18  |
| 1n40 | A   | 395    | 1.06 | 0.133 |
| 1n48 | A   | 291    | 2.2  | 0.204 |
| 1n4k | A   | 281    | 2.2  | 0.224 |
| 1n4n | A   | 47     | N/A  |       |
| 1n4w | A   | 467    | 0.92 | 0.103 |
| 1n4x | L   | 113    | 1.7  | 0.227 |
| 1n54 | A   | 338    | 2.72 | 0.263 |
| 1n5g | A   | 38     | N/A  |       |
| 1n5i | A   | 208    | 1.85 | 0.21  |
| 1n5u | A   | 574    | 1.9  | 0.235 |
| 1n61 | C   | 287    | 1.3  | 0.142 |
| 1n62 | A   | 161    | 1.09 | 0.144 |
| 1n63 | B   | 805    | 1.21 | 0.149 |
| 1n6f | A   | 998    | 2.7  | 0.247 |
| 1n6j | A   | 82     | 2.2  | 0.243 |
| 1n6z | A   | 105    | N/A  |       |
| 1n7e | A   | 95     | 1.5  | 0.254 |
| 1n7l | A   | 53     | N/A  |       |
| 1n7u | A   | 498    | 2.4  | 0.224 |
| 1n80 | A   | 324    | 2.45 | 0.236 |
| 1n81 | A   | 167    | 2.1  | 0.207 |
| 1n8l | A   | 76     | N/A  |       |
| 1n8m | A   | 38     | N/A  |       |
| 1n8p | A   | 294    | 2.6  | 0.253 |
| 1n8w | A   | 655    | 2.7  | 0.19  |
| 1n8y | C   | 592    | 2.4  | 0.224 |
| 1n8z | C   | 581    | 2.52 | 0.222 |
| 1n93 | X   | 330    | 1.76 | 0.163 |
| 1n9e | A   | 731    | 1.65 | 0.161 |
| 1n9p | A   | 189    | 1.8  | 0.231 |
| 1na6 | B   | 380    | 2.1  | 0.23  |
| 1nay | A   | 54     | 2.6  | 0.234 |
| 1nba | A   | 252    | 2    | 0.186 |
| 1nbc | A   | 155    | 1.75 | 0.193 |
| 1nbu | A   | 118    | 1.6  | 0.177 |
| 1nbw | A   | 573    | 2.4  | 0.232 |
| 1nc7 | D   | 110    | 1.55 | 0.17  |
| 1ncr | A   | 279    | 2.7  | 0.243 |
| 1ncs | A   | 47     | N/A  |       |
| 1ncy | A   | 162    | 2.1  | 0.13  |
| 1nd7 | A   | 318    | 2.1  | 0.243 |

|      |     |         |      |       |
|------|-----|---------|------|-------|
| 1nd9 | A   | 49      | N/A  |       |
| 1ne5 | A   | 42      | N/A  |       |
| 1nee | A   | 135     | N/A  |       |
| 1nei | A   | 60      | N/A  |       |
| 1neq | A   | 74      | N/A  |       |
| 1nex | B   | 427     | 2.7  | 0.239 |
| 1nf8 | A   | 207     | 1.6  | 0.134 |
| 1ng6 | A   | 148     | 1.4  | 0.21  |
| 1ng7 | A   | 60      | N/A  |       |
| 1ng9 | A   | 794     | 2.6  | 0.215 |
| 1ngk | H   | 126     | 2.11 | 0.186 |
| 1ngm | B   | 72      | 2.95 | 0.276 |
| 1nh1 | A   | 225     | 2.2  | 0.222 |
| 1nh2 | A/D | 177/103 | 1.9  | 0.201 |
| 1nh8 | A   | 276     | 1.8  | 0.198 |
| 1nhk | R   | 144     | 1.9  | 0.174 |
| 1nhm | A   | 79      | N/A  |       |
| 1nho | A   | 85      | N/A  |       |
| 1ni0 | C   | 127     | 2.5  | 0.228 |
| 1ni4 | B   | 317     | 1.95 | 0.202 |
| 1ni5 | A   | 299     | 2.65 | 0.223 |
| 1nig | A   | 142     | 2    | 0.211 |
| 1nij | A   | 302     | 2    | 0.223 |
| 1nj1 | A   | 159     | 2.55 | 0.225 |
| 1njh | A   | 101     | 1.7  | 0.22  |
| 1njq | A   | 37      | N/A  |       |
| 1nkg | A   | 508     | 1.5  | 0.164 |
| 1nks | A   | 136     | 2.57 | 0.164 |
| 1nkz | A   | 52      | 2    | 0.169 |
| 1nl0 | G   | 32      | 2.2  | 0.233 |
| 1nl3 | A   | 757     | 2.8  | 0.193 |
| 1nlf | A   | 254     | 1.95 | 0.201 |
| 1nlq | A   | 105     | 1.5  | 0.234 |
| 1nmp | A   | 247     | 2.2  | 0.212 |
| 1nmv | A   | 163     | N/A  |       |
| 1nn7 | A   | 105     | 2.1  | 0.23  |
| 1nnh | A   | 293     | 1.65 | 0.171 |
| 1nni | 1   | 143     | 2.5  | 0.221 |
| 1nnu | D   | 59      | 2.5  | 0.176 |
| 1nnv | A   | 107     | N/A  |       |
| 1no4 | A   | 62      | 2.2  | 0.239 |
| 1no5 | B   | 102     | 1.8  | 0.2   |
| 1no7 | A   | 400     | 2.9  | 0.255 |
| 1nof | A   | 383     | 1.42 | 0.102 |
| 1nog | A   | 139     | 1.55 | 0.197 |
| 1nol | A   | 607     | 2.4  | 0.181 |
| 1nox | A   | 196     | 1.59 | 0.182 |
| 1npe | B   | 164     | 2.3  | 0.223 |
| 1nr3 | A   | 122     | N/A  |       |
| 1nrb | A   | 63      | N/A  |       |
| 1nri | A   | 235     | 1.9  | 0.212 |
| 1nrj | A   | 138     | 1.7  | 0.194 |

|      |       |            |      |       |
|------|-------|------------|------|-------|
| 1nrv | A     | 100        | 1.65 | 0.224 |
| 1nsj | A     | 196        | 2    | 0.192 |
| 1nt2 | B     | 197        | 2.9  | 0.257 |
| 1ntv | A     | 152        | 1.5  | 0.222 |
| 1nty | A     | 288        | 1.7  | 0.195 |
| 1nu7 | D     | 275        | 2.2  | 0.209 |
| 1nui | A     | 242        | 2.9  | 0.235 |
| 1nvi | D     | 81         | 1.9  | 0.175 |
| 1nvm | B     | 312        | 1.7  | 0.189 |
| 1nvp | B     | 26         | 2.1  | 0.229 |
| 1nw1 | A     | 364        | 2.02 | 0.209 |
| 1nwa | A     | 168        | 1.5  | 0.16  |
| 1nxh | A     | 104        | 2.8  | 0.226 |
| 1ny1 | A     | 231        | 1.8  | 0.182 |
| 1ny9 | A     | 94         | N/A  |       |
| 1nyc | A     | 110        | 1.4  | 0.201 |
| 1nyh | A     | 64         | 3.1  | 0.271 |
| 1nyt | A     | 271        | 1.5  | 0.132 |
| 1nz0 | D     | 109        | 1.2  | 0.163 |
| 1nzi | B     | 155        | 1.5  | 0.216 |
| 1nzj | A     | 273        | 1.5  | 0.146 |
| 1nzo | A     | 352        | 1.85 | 0.208 |
| 1o0c | A     | 492        | 2.7  | 0.213 |
| 1o0w | B     | 234        | 2    | 0.195 |
| 1o1d | E     | 145        | 70   | N/A   |
| 1o1w | A     | 138        | N/A  |       |
| 1o1x | A     | 142        | 1.9  | 0.117 |
| 1o22 | A     | 146        | 2    | 0.182 |
| 1o26 | B     | 220        | 1.6  | 0.203 |
| 1o3u | A     | 119        | 1.75 | 0.179 |
| 1o54 | A     | 265        | 1.65 | 0.158 |
| 1o58 | A     | 293        | 1.8  | 0.157 |
| 1o6a | A     | 85         | 1.85 | 0.171 |
| 1o6d | A     | 147        | 1.66 | 0.229 |
| 1o6g | A     | 710        | 1.4  | 0.2   |
| 1o6s | B     | 98         | 1.8  | 0.168 |
| 1o6v | A     | 325        | 1.5  | 0.145 |
| 1o6w | A     | 75         | N/A  |       |
| 1o70 | A     | 271        | 2.6  | 0.225 |
| 1o71 | A     | 174        | 2.26 | 0.215 |
| 1o75 | B     | 332        | 1.95 | 0.205 |
| 1o7d | B/C/E | 73/149/108 | 2.7  | 0.257 |
| 1o7f | A     | 255        | 2.5  | 0.244 |
| 1o7i | A     | 115        | 1.2  | 0.191 |
| 1o7m | A     | 448        | 1.75 | 0.178 |
| 1o7q | A     | 287        | 1.3  | 0.107 |
| 1o83 | A     | 70         | 1.64 | 0.193 |
| 1o8a | A     | 575        | 2    | 0.18  |
| 1o8b | B     | 206        | 1.25 | 0.224 |
| 1o8r | A     | 94         | N/A  |       |
| 1o8t | A     | 23         | N/A  |       |
| 1o97 | D     | 315        | 1.6  | 0.201 |

|      |   |     |      |       |
|------|---|-----|------|-------|
| 1o98 | A | 470 | 1.4  | 0.19  |
| 1o9a | A | 93  | N/A  |       |
| 1o9t | A | 364 | 2.9  | 0.265 |
| 1oa8 | D | 133 | 1.7  | 0.21  |
| 1oaa | A | 258 | 1.25 | 0.2   |
| 1oac | B | 705 | 2    | 0.162 |
| 1oae | A | 124 | 1.95 | 0.185 |
| 1oaf | A | 250 | 1.4  | 0.161 |
| 1oao | C | 729 | 1.9  | 0.147 |
| 1oaw | A | 48  | N/A  |       |
| 1ob8 | B | 127 | 1.8  | 0.197 |
| 1obf | P | 334 | 1.7  | 0.166 |
| 1obg | A | 298 | 2.05 | 0.166 |
| 1occ | T | 64  | 2.8  | 0.201 |
| 1ocy | A | 198 | 1.5  | 0.143 |
| 1ocz | Y | 43  | 2.9  | 0.195 |
| 1od2 | A | 681 | 2.7  | 0.226 |
| 1od6 | A | 153 | 1.5  | 0.196 |
| 1odh | A | 114 | 2.85 | 0.219 |
| 1odz | A | 379 | 1.4  | 0.151 |
| 1ofc | X | 267 | 1.9  | 0.218 |
| 1ofn | A | 202 | 1.5  | 0.144 |
| 1oga | A | 270 | 1.4  | 0.218 |
| 1oge | A | 113 | 2.05 | 0.194 |
| 1ohm | A | 44  | N/A  |       |
| 1ohq | A | 120 | 2    | 0.182 |
| 1ohu | B | 149 | 2.03 | 0.212 |
| 1ohz | B | 56  | 2.2  | 0.21  |
| 1oi0 | A | 108 | 1.5  | 0.213 |
| 1oi2 | A | 333 | 1.75 | 0.172 |
| 1oi7 | A | 270 | 1.23 | 0.178 |
| 1oio | A | 178 | 1.7  | 0.216 |
| 1ois | A | 221 | 1.9  | 0.222 |
| 1oiz | A | 266 | 1.88 | 0.195 |
| 1ojh | D | 50  | 1.8  | 0.182 |
| 1ojr | A | 273 | 1.35 | 0.111 |
| 1ok0 | A | 65  | 0.93 | 0.103 |
| 1okb | A | 222 | 1.9  | 0.186 |
| 1okc | A | 269 | 2.2  | 0.22  |
| 1oke | A | 105 | 2.4  | 0.263 |
| 1okg | A | 305 | 2.1  | 0.208 |
| 1oks | A | 51  | 1.8  | 0.198 |
| 1olm | E | 397 | 1.95 | 0.18  |
| 1olt | A | 371 | 2.07 | 0.154 |
| 1olz | A | 562 | 2    | 0.206 |
| 1oma | A | 48  | N/A  |       |
| 1oms | C | 106 | 2.3  | 0.208 |
| 1omw | G | 60  | 2.5  | 0.202 |
| 1on2 | A | 135 | 1.61 | 0.22  |
| 1on3 | E | 519 | 1.9  | 0.168 |
| 1ong | A | 263 | 1.1  | 0.141 |
| 1onl | A | 127 | 2.5  | 0.186 |

|      |     |        |      |       |
|------|-----|--------|------|-------|
| 1oo4 | A   | 111    | N/A  |       |
| 1ooh | A   | 126    | 1.25 | 0.16  |
| 1op4 | A   | 136    | N/A  |       |
| 1ops | A   | 64     | 2    | 0.204 |
| 1oqj | A   | 90     | 1.55 | 0.194 |
| 1oqv | A   | 170    | 1.3  | 0.113 |
| 1oqw | A   | 144    | 2    | 0.223 |
| 1or7 | A/C | 181/66 | 2    | 0.197 |
| 1ord | A   | 730    | 3    | 0.219 |
| 1orq | C   | 11     | 3.2  | 0.253 |
| 1ors | C   | 94     | 1.9  | 0.231 |
| 1oru | A   | 170    | 1.8  | 0.196 |
| 1orw | A   | 692    | 2.84 | 0.187 |
| 1ory | B   | 29     | 2.45 | 0.215 |
| 1os1 | A   | 519    | 1.8  | 0.2   |
| 1os6 | A   | 71     | 1.45 | 0.182 |
| 1osf | A   | 215    | 1.75 | 0.184 |
| 1osl | A   | 62     | N/A  |       |
| 1osy | A   | 114    | 1.7  | 0.182 |
| 1otf | A   | 59     | 1.9  | 0.202 |
| 1ou0 | B   | 165    | 2.1  | 0.202 |
| 1oul | A   | 103    | 2.2  | 0.256 |
| 1oup | A   | 213    | 2.3  | 0.191 |
| 1ouw | C   | 151    | 1.37 | 0.153 |
| 1ova | A   | 384    | 1.95 | 0.169 |
| 1ovn | A   | 223    | 1.9  | 0.216 |
| 1ovy | A   | 97     | N/A  |       |
| 1ow1 | A   | 167    | 1.8  | 0.214 |
| 1ow4 | A   | 120    | 1.6  | 0.174 |
| 1ox0 | A   | 414    | 1.3  | 0.138 |
| 1oxj | A   | 169    | 1.8  | 0.229 |
| 1oxw | C   | 350    | 2.2  | 0.22  |
| 1oy3 | C   | 127    | 2.05 | 0.218 |
| 1oyw | A   | 497    | 1.8  | 0.193 |
| 1oz2 | A   | 324    | 1.55 | 0.189 |
| 1oz9 | A   | 141    | 1.89 | 0.205 |
| 1ozj | A   | 102    | 2.4  | 0.21  |
| 1p0a | A   | 44     | N/A  |       |
| 1p0s | L   | 73     | 2.8  | 0.207 |
| 1p0y | B   | 209    | 2.55 | 0.228 |
| 1p0z | A   | 124    | 1.6  | 0.168 |
| 1p1j | A   | 523    | 1.7  | 0.165 |
| 1p27 | A   | 144    | 2    | 0.22  |
| 1p30 | A   | 871    | 2.5  | 0.158 |
| 1p32 | A   | 163    | 2.25 | 0.173 |
| 1p3c | A   | 212    | 1.5  | 0.153 |
| 1p3q | Q   | 42     | 1.7  | 0.26  |
| 1p4e | B   | 301    | 2.7  | 0.236 |
| 1p4o | B   | 314    | 1.5  | 0.209 |
| 1p4p | A   | 135    | 2    | 0.211 |
| 1p4q | A   | 52     | N/A  |       |
| 1p4x | A   | 227    | 2.2  | 0.24  |

|      |     |        |      |       |
|------|-----|--------|------|-------|
| 1p57 | A   | 107    | 1.75 | 0.186 |
| 1p5u | B   | 146    | 1.99 | 0.166 |
| 1p68 | A   | 102    | N/A  |       |
| 1p6o | B   | 161    | 1.14 | 0.11  |
| 1p6t | A   | 139    | N/A  |       |
| 1p6x | A   | 326    | 2    | 0.187 |
| 1p71 | A   | 94     | 1.9  | 0.244 |
| 1p7a | A   | 37     | N/A  |       |
| 1p8a | A   | 146    | N/A  |       |
| 1p8b | A   | 37     | N/A  |       |
| 1p8c | E   | 104    | 2.3  | 0.225 |
| 1p8l | A   | 273    | 2.95 | 0.263 |
| 1p90 | A   | 121    | 1.8  | 0.188 |
| 1p94 | A   | 76     | N/A  |       |
| 1p9j | A   | 54     | N/A  |       |
| 1p9k | A   | 79     | N/A  |       |
| 1p9p | A   | 173    | 2.5  | 0.196 |
| 1paq | A   | 155    | 2.3  | 0.243 |
| 1pb5 | A   | 35     | N/A  |       |
| 1pb6 | A   | 190    | 2.5  | 0.238 |
| 1pb8 | A   | 282    | 1.45 | 0.204 |
| 1pba | A   | 66     | N/A  |       |
| 1pbj | A   | 111    | 1.4  | 0.192 |
| 1pbt | A   | 215    | 1.7  | 0.179 |
| 1pbw | B   | 190    | 2    | 0.184 |
| 1pby | A/C | 485/77 | 1.7  | 0.191 |
| 1pc4 | A   | 106    | 1.65 | 0.159 |
| 1pc6 | A   | 70     | 2.51 | 0.234 |
| 1pcf | A   | 66     | 1.74 | 0.197 |
| 1pcn | A   | 93     | N/A  |       |
| 1pdo | A   | 129    | 1.7  | 0.189 |
| 1pdy | A   | 409    | 2.4  | 0.215 |
| 1pe4 | A   | 67     | N/A  |       |
| 1pee | A   | 180    | 1.5  | 0.186 |
| 1peh | A   | 33     | N/A  |       |
| 1pfb | A   | 55     | 1.4  | 0.197 |
| 1pfk | A   | 298    | 2.4  | 0.165 |
| 1pfl | A   | 139    | N/A  |       |
| 1pft | A   | 50     | N/A  |       |
| 1pfv | A   | 547    | 1.7  | 0.186 |
| 1pg4 | B   | 639    | 1.75 | 0.184 |
| 1pg6 | A   | 202    | 1.7  | 0.213 |
| 1pgx | A   | 68     | 1.66 | 0.191 |
| 1ph5 | B   | 155    | 2.3  | 0.228 |
| 1pj6 | A   | 828    | 1.65 | 0.156 |
| 1pjq | B   | 429    | 2.21 | 0.235 |
| 1pjx | A   | 308    | 0.85 | 0.121 |
| 1pjz | A   | 201    | N/A  |       |
| 1pk0 | C   | 316    | 3.3  | 0.264 |
| 1pkl | G   | 426    | 2.35 | 0.209 |
| 1pkp | A   | 143    | 2.8  | 0.22  |
| 1plk | A   | 137    | 2.8  | 0.228 |

|      |   |      |      |       |
|------|---|------|------|-------|
| 1pm3 | A | 58   | 3.15 | 0.255 |
| 1pm6 | A | 72   | N/A  |       |
| 1pmc | A | 36   | N/A  |       |
| 1pmi | A | 440  | 1.7  | 0.184 |
| 1pmj | X | 185  | 1.55 | 0.124 |
| 1pnf | A | 314  | 2    | 0.197 |
| 1po6 | A | 183  | 2.1  | 0.234 |
| 1poc | A | 133  | 2    | 0.192 |
| 1poz | A | 130  | N/A  |       |
| 1pp8 | P | 24   | 3.05 | 0.269 |
| 1ppo | A | 216  | 1.8  | 0.155 |
| 1ppr | N | 305  | 2    | 0.179 |
| 1pq1 | B | 33   | 1.65 | 0.219 |
| 1pq8 | A | 203  | 1    | 0.128 |
| 1pqf | A | 122  | 2    | 0.165 |
| 1qax | A | 91   | N/A  |       |
| 1prb | A | 53   | N/A  |       |
| 1pre | B | 451  | 2.8  | 0.208 |
| 1prv | A | 56   | N/A  |       |
| 1prz | A | 242  | 1.8  | 0.218 |
| 1ps3 | A | 1014 | 1.8  | 0.2   |
| 1psm | A | 38   | N/A  |       |
| 1psp | A | 105  | 2.5  | 0.2   |
| 1psr | A | 97   | 1.05 | 0.107 |
| 1ptr | A | 50   | 2.2  | 0.194 |
| 1pu5 | A | 163  | 1.9  | 0.214 |
| 1pu6 | B | 216  | 1.64 | 0.151 |
| 1puj | A | 255  | 2    | 0.216 |
| 1puo | B | 142  | 1.85 | 0.201 |
| 1puz | A | 82   | N/A  |       |
| 1pv1 | A | 290  | 2.3  | 0.255 |
| 1pv5 | A | 245  | 1.75 | 0.198 |
| 1pvj | A | 339  | 3    | 0.227 |
| 1pw4 | A | 260  | 3.3  | 0.296 |
| 1px5 | B | 339  | 1.74 | 0.187 |
| 1pxe | A | 48   | N/A  |       |
| 1pxf | A | 111  | 1.87 | 0.149 |
| 1pyi | A | 88   | 3.2  | 0.245 |
| 1pyt | A | 94   | 2.35 | 0.192 |
| 1pyv | A | 53   | N/A  |       |
| 1pz4 | A | 111  | 1.35 | 0.187 |
| 1pzw | A | 56   | 2    | 0.241 |
| 1q05 | B | 127  | 2.2  | 0.208 |
| 1q08 | A | 94   | 1.9  | 0.183 |
| 1q0v | A | 81   | N/A  |       |
| 1q16 | C | 223  | 1.9  | 0.202 |
| 1q23 | B | 215  | 2.18 | 0.192 |
| 1q27 | A | 171  | N/A  |       |
| 1q38 | A | 89   | N/A  |       |
| 1q3j | A | 36   | N/A  |       |
| 1q3v | A | 225  | 2.91 | 0.247 |
| 1q4k | C | 162  | 2.3  | 0.245 |

|      |     |        |      |       |
|------|-----|--------|------|-------|
| 1q50 | A   | 540    | 2.6  | 0.195 |
| 1q51 | B   | 252    | 2.3  | 0.202 |
| 1q5r | J   | 215    | 3.1  | 0.229 |
| 1q5w | A   | 31     | N/A  |       |
| 1q5z | A   | 145    | 1.8  | 0.194 |
| 1q60 | A   | 99     | N/A  |       |
| 1q68 | A   | 38     | N/A  |       |
| 1q6z | A   | 524    | 1    | 0.122 |
| 1q79 | A   | 448    | 2.15 | 0.205 |
| 1q7h | A   | 142    | 2.1  | 0.169 |
| 1q7l | B   | 88     | 1.4  | 0.133 |
| 1q7t | A   | 303    | 1.9  | 0.19  |
| 1q81 | 2/D | 56/185 | 2.95 | 0.21  |
| 1q82 | P   | 99     | 2.98 | 0.207 |
| 1q86 | M   | 65     | 3    | 0.234 |
| 1q88 | B   | 148    | 2.42 | 0.19  |
| 1q8c | A   | 132    | 2    | 0.254 |
| 1q8d | A   | 99     | 1.8  | 0.193 |
| 1q8f | A   | 308    | 1.7  | 0.153 |
| 1q8h | A   | 34     | 2    | 0.255 |
| 1q8i | A   | 704    | 2    | 0.197 |
| 1q8k | A   | 300    | N/A  |       |
| 1q8r | A   | 118    | 1.9  | 0.19  |
| 1q90 | R   | 31     | 3.1  | 0.222 |
| 1q92 | A   | 195    | 1.4  | 0.133 |
| 1q95 | L   | 12     | 2.46 | 0.23  |
| 1q9b | A   | 42     | 1.5  | 0.128 |
| 1q9s | A   | 144    | 2.42 | 0.199 |
| 1qa4 | A   | 56     | N/A  |       |
| 1qab | E   | 141    | 3.2  | 0.278 |
| 1qbf | A   | 36     | N/A  |       |
| 1qcn | B   | 404    | 1.9  | 0.191 |
| 1qcs | A   | 190    | 1.9  | 0.21  |
| 1qcz | A   | 159    | 1.5  | 0.186 |
| 1qdd | A   | 144    | 1.3  | 0.132 |
| 1qdp | A   | 42     | N/A  |       |
| 1qdv | A   | 96     | 1.6  | 0.238 |
| 1qf6 | A   | 497    | 2.9  | 0.195 |
| 1qfd | A   | 32     | N/A  |       |
| 1qfh | A   | 196    | 2.2  | 0.222 |
| 1qfq | B   | 35     | N/A  |       |
| 1qge | E   | 97     | 1.7  | 0.187 |
| 1qgi | A   | 259    | 1.6  | 0.192 |
| 1qgk | B   | 29     | 2.5  | 0.221 |
| 1qgu | D   | 519    | 1.6  | 0.156 |
| 1qh4 | A   | 369    | 1.41 | 0.134 |
| 1qh5 | A   | 260    | 1.45 | 0.204 |
| 1qhd | A   | 397    | 1.95 | 0.188 |
| 1qhh | C/D | 84/93  | 2.5  | 0.228 |
| 1qhk | A   | 47     | N/A  |       |
| 1qhl | A   | 197    | 2.2  | 0.217 |
| 1qhp | A   | 686    | 1.7  | 0.153 |

|      |       |        |      |       |
|------|-------|--------|------|-------|
| 1qht | A     | 674    | 2.1  | 0.245 |
| 1qjk | A     | 36     | N/A  |       |
| 1qjz | B     | 188    | 3.8  | 0.326 |
| 1qk7 | A     | 32     | N/A  |       |
| 1qkd | A     | 61     | 1.49 | 0.169 |
| 1qkl | A     | 127    | N/A  |       |
| 1qkr | A     | 172    | 1.8  | 0.2   |
| 1qks | A     | 559    | 1.28 | 0.185 |
| 1qlb | B     | 238    | 2.33 | 0.213 |
| 1qld | A     | 50     | N/A  |       |
| 1qlm | A     | 316    | 2    | 0.198 |
| 1qlo | A     | 34     | N/A  |       |
| 1qmd | A     | 362    | 2.2  | 0.198 |
| 1qmg | A     | 514    | 1.6  | 0.196 |
| 1qmr | A     | 159    | 2.15 | 0.196 |
| 1qmv | A     | 195    | 1.7  | 0.192 |
| 1qox | N     | 449    | 2.7  | 0.255 |
| 1qoy | A     | 303    | 2    | 0.198 |
| 1qp6 | A     | 35     | N/A  |       |
| 1qpq | A     | 283    | 2.45 | 0.178 |
| 1qqg | B     | 209    | 2.3  | 0.191 |
| 1qqp | 4-Feb | 208/45 | 1.9  | 0.161 |
| 1qqr | A     | 119    | 2.3  | 0.197 |
| 1qqw | B     | 500    | 2.75 | 0.206 |
| 1qqy | A     | 129    | 1.85 | 0.178 |
| 1qs1 | A     | 402    | 1.5  | 0.235 |
| 1qsa | A     | 618    | 1.65 | 0.168 |
| 1qtn | B     | 90     | 1.2  | 0.166 |
| 1qu2 | A     | 733    | 2.2  | 0.239 |
| 1qu9 | A     | 126    | 1.2  | 0.164 |
| 1qun | B     | 273    | 2.8  | 0.24  |
| 1qvg | 2     | 35     | 2.9  | 0.201 |
| 1qvi | A     | 696    | 2.54 | 0.212 |
| 1qvr | A     | 139    | 3    | 0.263 |
| 1qw2 | A     | 97     | 1.5  | 0.203 |
| 1qw9 | A     | 497    | 1.2  | 0.16  |
| 1qwd | A     | 167    | 1.75 | 0.169 |
| 1qwy | A     | 234    | 1.3  | 0.163 |
| 1qx0 | A     | 277    | 2.26 | 0.234 |
| 1qx2 | A     | 75     | 1.44 | 0.156 |
| 1qxf | A     | 58     | N/A  |       |
| 1qxy | A     | 249    | 1.04 | 0.142 |
| 1qy7 | A     | 112    | 2    | 0.199 |
| 1qyn | D     | 112    | 2.35 | 0.234 |
| 1qz2 | A     | 203    | 3    | 0.23  |
| 1qze | A     | 214    | N/A  |       |
| 1qzm | A     | 94     | 1.9  | 0.179 |
| 1qzn | A     | 171    | 1.9  | 0.159 |
| 1qzr | A     | 378    | 1.9  | 0.196 |
| 1r02 | A     | 33     | N/A  |       |
| 1r0d | A     | 178    | 1.9  | 0.224 |
| 1r0s | A     | 251    | 2    | 0.229 |

|      |     |       |      |       |
|------|-----|-------|------|-------|
| 1r0u | A   | 142   | 1.75 | 0.185 |
| 1r1f | A   | 37    | N/A  |       |
| 1r1m | A   | 132   | 1.9  | 0.213 |
| 1r26 | A   | 113   | 1.4  | 0.168 |
| 1r2a | A   | 46    | N/A  |       |
| 1r2m | A   | 68    | 1    | 0.137 |
| 1r2q | A   | 165   | 1.05 | 0.124 |
| 1r3b | A   | 202   | N/A  |       |
| 1r3d | A   | 253   | 1.9  | 0.179 |
| 1r3i | C   | 99    | 2.4  | 0.217 |
| 1r44 | A   | 202   | 2.25 | 0.254 |
| 1r48 | A   | 33    | N/A  |       |
| 1r4p | D   | 70    | 1.77 | 0.151 |
| 1r4x | A   | 273   | 1.9  | 0.173 |
| 1r5e | A   | 105   | N/A  |       |
| 1r5i | H   | 194   | 2.6  | 0.238 |
| 1r5s | A   | 132   | N/A  |       |
| 1r5t | A   | 135   | 2    | 0.188 |
| 1r5z | A   | 320   | 1.95 | 0.191 |
| 1r6f | A   | 272   | 2.17 | 0.217 |
| 1r6m | A   | 231   | 2    | 0.226 |
| 1r6o | C   | 87    | 2.25 | 0.19  |
| 1r71 | B   | 81    | 2.2  | 0.195 |
| 1r75 | A   | 109   | 1.86 | 0.201 |
| 1r79 | A   | 84    | N/A  |       |
| 1r7a | A   | 503   | 1.77 | 0.164 |
| 1r7h | A   | 74    | 2.69 | 0.243 |
| 1r7l | B   | 107   | 2    | 0.223 |
| 1r8g | B   | 348   | 2.15 | 0.189 |
| 1r8h | A   | 78    | 1.9  | 0.191 |
| 1r8m | E   | 194   | 1.7  | 0.192 |
| 1r8o | A/B | 96/71 | 1.83 | 0.168 |
| 1r8u | B   | 100   | N/A  |       |
| 1r95 | A   | 87    | 2.65 | 0.232 |
| 1r9f | A   | 113   | 1.85 | 0.212 |
| 1r9q | A   | 309   | 2.05 | 0.172 |
| 1r9w | A   | 135   | 1.8  | 0.213 |
| 1r9z | A   | 423   | 1.32 | 0.166 |
| 1ra4 | A   | 116   | 1.86 | 0.173 |
| 1rcq | A   | 356   | 1.45 | 0.149 |
| 1rdu | A   | 116   | N/A  |       |
| 1re0 | B   | 189   | 2.4  | 0.209 |
| 1re6 | A   | 94    | N/A  |       |
| 1reg | X   | 122   | 1.9  | 0.18  |
| 1rep | C   | 210   | 2.6  | 0.213 |
| 1rer | A   | 242   | 3.2  | 0.265 |
| 1rf8 | B   | 100   | N/A  |       |
| 1rgr | A   | 93    | N/A  |       |
| 1rgv | A   | 66    | 2.9  | 0.197 |
| 1rgx | C   | 94    | 1.79 | 0.204 |
| 1rh1 | A   | 490   | 2.5  | 0.197 |
| 1rhc | A   | 329   | 1.8  | 0.158 |

|      |     |        |      |       |
|------|-----|--------|------|-------|
| 1rhf | A   | 169    | 1.96 | 0.209 |
| 1rhh | B   | 221    | 1.9  | 0.224 |
| 1rhy | A   | 158    | 2.3  | 0.189 |
| 1rhz | A   | 50     | 3.5  | 0.254 |
| 1ri0 | A   | 100    | N/A  |       |
| 1ri9 | A   | 77     | N/A  |       |
| 1rif | A   | 282    | 2    | 0.218 |
| 1rin | D   | 48     | 2.6  | 0.183 |
| 1rip | A   | 81     | N/A  |       |
| 1riy | A   | 71     | 1.8  | 0.216 |
| 1rj1 | A   | 148    | 1.87 | 0.194 |
| 1rj9 | A   | 277    | 1.9  | 0.206 |
| 1rji | A   | 31     | N/A  |       |
| 1rjj | A   | 111    | N/A  |       |
| 1rk4 | A   | 213    | 1.79 | 0.176 |
| 1rk5 | A   | 474    | 1.8  | 0.183 |
| 1rk8 | C   | 32     | 1.9  | 0.235 |
| 1rki | A   | 101    | 1.6  | 0.184 |
| 1rkl | A   | 36     | N/A  |       |
| 1rkq | A   | 271    | 1.4  | 0.177 |
| 1rkt | A   | 195    | 1.95 | 0.208 |
| 1rku | A   | 206    | 1.47 | 0.189 |
| 1rl0 | A   | 255    | 1.4  | 0.184 |
| 1rl2 | B   | 132    | 2.3  | 0.203 |
| 1rl6 | A   | 162    | 2    | 0.257 |
| 1rlk | A   | 116    | 1.95 | 0.212 |
| 1rlv | A   | 296    | 3    | 0.229 |
| 1rmd | A   | 115    | 2.1  | 0.209 |
| 1rmk | A   | 31     | N/A  |       |
| 1rni | A   | 158    | 1.85 | 0.243 |
| 1ro3 | A   | 49     | N/A  |       |
| 1ro7 | A   | 239    | 1.8  | 0.217 |
| 1roc | A   | 155    | 1.5  | 0.198 |
| 1rod | A   | 72     | N/A  |       |
| 1rp3 | A/B | 199/36 | 2.3  | 0.242 |
| 1rp4 | A   | 253    | 2.2  | 0.217 |
| 1rp5 | A   | 403    | 3    | 0.231 |
| 1rp7 | A   | 800    | 2.09 | 0.192 |
| 1rpy | B   | 85     | 2.3  | 0.228 |
| 1rq9 | A   | 99     | 2.6  | 0.254 |
| 1rqg | A   | 460    | 2.9  | 0.244 |
| 1rr7 | A   | 53     | 2.2  | 0.252 |
| 1rre | E   | 187    | 1.75 | 0.205 |
| 1rrz | A   | 66     | N/A  |       |
| 1rsy | A   | 128    | 1.9  | 0.186 |
| 1rtg | A   | 198    | 2.6  | 0.179 |
| 1rtq | A   | 291    | 0.95 | 0.135 |
| 1rtt | A   | 174    | 1.28 | 0.211 |
| 1rtu | A   | 113    | 1.8  | 0.141 |
| 1ru4 | A   | 400    | 1.6  | 0.167 |
| 1ru8 | A   | 199    | 2.7  | 0.218 |
| 1ruw | A   | 69     | 1.8  | 0.173 |

|      |                            |                             |      |       |
|------|----------------------------|-----------------------------|------|-------|
| 1rv9 | A                          | 242                         | 1.53 | 0.197 |
| 1rvb | A                          | 237                         | 2.1  | 0.165 |
| 1rvk | A                          | 370                         | 1.7  | 0.193 |
| 1rw1 | A                          | 111                         | 1.02 | 0.129 |
| 1rw2 | A                          | 152                         | N/A  |       |
| 1rws | A                          | 68                          | N/A  |       |
| 1rwt | F                          | 218                         | 2.72 | 0.194 |
| 1rwx | A                          | 169                         | 1.85 | 0.214 |
| 1rxq | B                          | 172                         | 1.7  | 0.186 |
| 1rxx | C                          | 381                         | 2.45 | 0.198 |
| 1ry3 | A                          | 64                          | N/A  |       |
| 1ry6 | A                          | 304                         | 1.6  | 0.205 |
| 1ry9 | A                          | 133                         | 1.82 | 0.181 |
| 1rya | A                          | 160                         | 1.3  | 0.169 |
| 1ryk | A                          | 69                          | N/A  |       |
| 1ryl | A                          | 157                         | 1.6  | 0.212 |
| 1ryp | 1/G/R                      | 219/221/199                 | 1.9  | 0.286 |
| 1ryu | A                          | 79                          | N/A  |       |
| 1rz2 | A                          | 214                         | 1.6  | 0.225 |
| 1rz4 | A                          | 207                         | 2.1  | 0.187 |
| 1rzj | G                          | 273                         | 2.2  | 0.262 |
| 1rzs | A                          | 61                          | N/A  |       |
| 1rzw | A                          | 123                         | N/A  |       |
| 1s0g | A                          | 1288                        | 2.6  | 0.21  |
| 1s12 | A                          | 89                          | 2    | 0.214 |
| 1s1h | B//J/K/L/Q/S               | 40/29/10/36/20/17/14        | 11.7 | N/A   |
| 1s1i | D/E/F//L/M/O/P/T/U/V/W/Y/Z | 9/4/8/3/2/5/5/6/2/2/5/4/2/2 | 11.7 | N/A   |
| 1s20 | G                          | 320                         | 2.2  | 0.191 |
| 1s28 | A                          | 107                         | 3    | 0.248 |
| 1s29 | A                          | 89                          | 1.6  | 0.232 |
| 1s2d | B                          | 164                         | 2.1  | 0.229 |
| 1s2e | A                          | 269                         | 2.3  | 0.239 |
| 1s2h | A                          | 205                         | N/A  |       |
| 1s2o | A                          | 244                         | 1.4  | 0.182 |
| 1s2x | A                          | 171                         | 1.9  | 0.229 |
| 1s35 | A                          | 208                         | 2.4  | 0.222 |
| 1s3a | A                          | 85                          | N/A  |       |
| 1s3h | A                          | 471                         | 2.5  | 0.205 |
| 1s3i | A                          | 307                         | 2.3  | 0.242 |
| 1s3p | A                          | 109                         | 2    | 0.181 |
| 1s3r | A                          | 470                         | 2.6  | 0.229 |
| 1s4m | A                          | 245                         | 2.1  | 0.212 |
| 1s4n | A                          | 337                         | 2.01 | 0.18  |
| 1s4x | A                          | 47                          | N/A  |       |
| 1s4y | B/C                        | 111/95                      | 2.3  | 0.206 |
| 1s4z | A                          | 75                          | N/A  |       |
| 1s5e | A                          | 232                         | 1.9  | 0.167 |
| 1s5l | B/C/E/H/T/U/X              | 208/130/7/11/21/35/1        | 3.5  | 0.296 |
| 1s62 | A                          | 102                         | N/A  |       |
| 1s6d | A                          | 103                         | N/A  |       |
| 1s6i | A                          | 182                         | N/A  |       |
| 1s72 | H/M/X/Z                    | 123/194/72/69               | 2.4  | 0.188 |

|      |     |         |      |       |
|------|-----|---------|------|-------|
| 1s7e | A   | 147     | N/A  |       |
| 1s7i | A   | 124     | 1.8  | 0.218 |
| 1s7z | A   | 101     | 1.83 | 0.17  |
| 1s8e | A   | 273     | 2.3  | 0.231 |
| 1s8n | A   | 190     | 1.48 | 0.203 |
| 1s9h | A/C | 245/102 | 2.4  | 0.227 |
| 1s9u | A   | 198     | 1.38 | 0.161 |
| 1sa3 | A   | 262     | 1.95 | 0.223 |
| 1sal | A   | 42      | N/A  |       |
| 1sau | A   | 105     | 1.12 | 0.109 |
| 1sb0 | A   | 87      | N/A  |       |
| 1sb7 | B   | 307     | 2.2  | 0.216 |
| 1sbx | A   | 96      | 1.65 | 0.17  |
| 1sbz | D   | 174     | 2    | 0.176 |
| 1scy | A   | 31      | N/A  |       |
| 1sdi | A   | 213     | 1.65 | 0.15  |
| 1sdo | A   | 192     | 1.85 | 0.22  |
| 1sdw | A   | 282     | 1.85 | 0.197 |
| 1se0 | A   | 96      | 1.75 | 0.212 |
| 1se8 | A   | 205     | 1.8  | 0.217 |
| 1sed | A   | 106     | 2.1  | 0.189 |
| 1seg | A   | 64      | 1.3  | 0.153 |
| 1sei | A   | 130     | 1.9  | 0.222 |
| 1sen | A   | 133     | 1.2  | 0.162 |
| 1ses | A   | 399     | 2.5  | 0.176 |
| 1sez | A   | 231     | 2.9  | 0.227 |
| 1sf8 | G   | 104     | 2.6  | 0.223 |
| 1sfd | A   | 105     | 0.99 | 0.116 |
| 1sg4 | B   | 256     | 1.3  | 0.157 |
| 1sgg | A   | 67      | N/A  |       |
| 1sgm | A   | 184     | 2    | 0.233 |
| 1sh1 | A   | 48      | N/A  |       |
| 1sh8 | A   | 153     | 1.5  | 0.197 |
| 1shs | A   | 84      | 2.9  | 0.216 |
| 1shu | X   | 181     | 1.5  | 0.187 |
| 1si2 | A   | 90      | 2.6  | 0.221 |
| 1sig | A   | 300     | 2.6  | 0.218 |
| 1siq | A   | 382     | 2.1  | 0.198 |
| 1sis | A   | 35      | N/A  |       |
| 1six | A   | 147     | 1.3  | 0.12  |
| 1sj1 | A   | 60      | 1.5  | 0.194 |
| 1sj8 | A   | 297     | 2.6  | 0.258 |
| 1sjw | A   | 142     | 1.35 | 0.143 |
| 1sk8 | A   | 435     | 1.65 | 0.175 |
| 1skn | P   | 64      | 2.5  | 0.22  |
| 1skq | A   | 414     | 1.8  | 0.219 |
| 1skz | A   | 104     | 1.9  | 0.217 |
| 1slq | A   | 77      | 3.2  | 0.308 |
| 1sm7 | A   | 109     | N/A  |       |
| 1smb | A   | 131     | 1.55 | 0.188 |
| 1snl | A   | 99      | N/A  |       |
| 1sox | A   | 449     | 1.9  | 0.175 |

|      |     |        |      |       |
|------|-----|--------|------|-------|
| 1soy | A   | 106    | N/A  |       |
| 1sp4 | A   | 47     | 2.2  | N/A   |
| 1sp8 | D   | 386    | 2    | 0.275 |
| 1sqe | B   | 106    | 1.5  | 0.203 |
| 1sqj | B   | 767    | 2.2  | 0.217 |
| 1sr6 | B   | 69     | 2.75 | 0.242 |
| 1sr8 | A   | 279    | 1.9  | 0.209 |
| 1sr9 | B   | 562    | 2    | 0.169 |
| 1srq | A/D | 330/66 | 2.9  | 0.232 |
| 1srv | A   | 144    | 1.7  | 0.199 |
| 1ss1 | A   | 62     | N/A  |       |
| 1ss3 | A   | 50     | N/A  |       |
| 1ssf | A   | 123    | N/A  |       |
| 1ssl | A   | 48     | N/A  |       |
| 1ssq | D   | 257    | 1.85 | 0.198 |
| 1ssz | A   | 34     | N/A  |       |
| 1st4 | A   | 285    | 2.02 | 0.201 |
| 1stf | I   | 98     | 2.37 | 0.19  |
| 1stz | A   | 323    | 2.2  | 0.215 |
| 1su3 | B   | 405    | 2.2  | 0.223 |
| 1su8 | A   | 633    | 1.1  | 0.146 |
| 1sum | B   | 224    | 2    | 0.217 |
| 1suu | A   | 293    | 1.75 | 0.194 |
| 1suw | A   | 167    | 2.45 | 0.211 |
| 1sv0 | C   | 79     | 2.07 | 0.232 |
| 1sva | 2   | 284    | 3.1  | 0.257 |
| 1svf | A   | 64     | 1.4  | 0.181 |
| 1svl | A   | 295    | 1.95 | 0.236 |
| 1sx6 | A   | 185    | 1.95 | 0.192 |
| 1sxr | A   | 173    | 1.56 | 0.177 |
| 1sy6 | H   | 219    | 2.1  | 0.211 |
| 1syr | A   | 103    | 2.95 | 0.197 |
| 1szh | A   | 146    | 1.5  | 0.209 |
| 1szi | A   | 177    | 2.8  | 0.236 |
| 1szn | A   | 417    | 1.54 | 0.151 |
| 1szq | A   | 406    | 2.7  | 0.204 |
| 1t06 | A   | 235    | 1.9  | 0.196 |
| 1t07 | A   | 72     | 1.8  | 0.192 |
| 1t0f | A/C | 261/47 | 1.85 | 0.211 |
| 1t0g | A   | 109    | N/A  |       |
| 1t0h | B   | 180    | 1.97 | 0.185 |
| 1t0t | Z   | 243    | 1.75 | 0.156 |
| 1t0z | A   | 72     | 2.6  | 0.2   |
| 1t11 | A   | 212    | 2.5  | 0.239 |
| 1t15 | A   | 211    | 1.85 | 0.206 |
| 1t16 | A   | 190    | 2.6  | 0.257 |
| 1t1e | A   | 473    | 1.18 | 0.213 |
| 1t1j | B   | 125    | 1.7  | 0.202 |
| 1t2e | A   | 311    | 1.85 | 0.156 |
| 1t2k | A   | 50     | 3    | 0.257 |
| 1t2t | A   | 96     | 2.5  | 0.238 |
| 1t3g | A   | 142    | 2.3  | 0.228 |

|      |   |      |      |       |
|------|---|------|------|-------|
| 1t3k | A | 132  | N/A  |       |
| 1t3t | A | 1278 | 1.9  | 0.188 |
| 1t3v | A | 124  | N/A  |       |
| 1t3w | B | 65   | 2.8  | 0.269 |
| 1t43 | A | 239  | 3.2  | 0.289 |
| 1t4e | A | 94   | 2.6  | 0.239 |
| 1t4h | B | 193  | 1.8  | 0.188 |
| 1t4l | B | 90   | N/A  |       |
| 1t50 | A | 58   | N/A  |       |
| 1t5l | A | 335  | 2.6  | 0.23  |
| 1t62 | B | 158  | 3    | 0.215 |
| 1t6a | A | 119  | 2.05 | 0.194 |
| 1t6b | X | 676  | 2.5  | 0.207 |
| 1t6c | A | 306  | 1.53 | 0.162 |
| 1t6g | A | 368  | 1.8  | 0.158 |
| 1t6t | 2 | 108  | 1.8  | 0.18  |
| 1t6u | A | 117  | 1.3  | 0.158 |
| 1t77 | A | 381  | 2.4  | 0.21  |
| 1t84 | A | 107  | N/A  |       |
| 1t8e | A | 639  | 2.54 | 0.22  |
| 1t8k | A | 76   | 1.1  | 0.133 |
| 1t8u | B | 260  | 1.95 | 0.199 |
| 1t92 | A | 108  | 1.6  | 0.167 |
| 1t94 | A | 347  | 2.4  | 0.246 |
| 1t95 | A | 208  | 1.9  | 0.212 |
| 1t9g | C | 382  | 2.9  | 0.191 |
| 1t9h | A | 281  | 1.6  | 0.144 |
| 1t9i | B | 155  | 1.6  | 0.194 |
| 1tab | I | 36   | 2.3  | 0.2   |
| 1tac | A | 86   | N/A  |       |
| 1taz | A | 311  | 1.77 | 0.182 |
| 1tba | A | 67   | N/A  |       |
| 1tbo | A | 66   | N/A  |       |
| 1tc5 | A | 186  | 1.93 | 0.199 |
| 1td6 | A | 263  | 2.5  | 0.244 |
| 1te2 | A | 208  | 1.76 | 0.174 |
| 1te6 | A | 434  | 1.8  | 0.206 |
| 1tej | B | 59   | 1.9  | 0.213 |
| 1ten | A | 90   | 1.8  | 0.196 |
| 1tex | D | 238  | 2.6  | 0.218 |
| 1tf6 | D | 75   | 3.1  | 0.308 |
| 1tff | A | 211  | 2.1  | 0.188 |
| 1tfg | A | 107  | 1.95 | 0.194 |
| 1tfi | A | 35   | N/A  |       |
| 1tfq | A | 117  | N/A  |       |
| 1tfr | A | 282  | 2.06 | 0.205 |
| 1tgj | A | 112  | 2    | 0.175 |
| 1tgs | I | 52   | 1.8  | 0.186 |
| 1th1 | C | 13   | 2.5  | 0.225 |
| 1thx | A | 108  | 1.6  | 0.175 |
| 1tig | A | 88   | 2    | 0.207 |
| 1tii | C | 36   | 2.25 | 0.191 |

|      |     |       |      |       |
|------|-----|-------|------|-------|
| 1tiu | A   | 89    | N/A  |       |
| 1tiv | A   | 86    | N/A  |       |
| 1tjf | B   | 178   | 2.21 | 0.197 |
| 1tjg | H   | 233   | 2    | 0.198 |
| 1tjl | A   | 113   | 2    | 0.228 |
| 1tjx | A   | 157   | 1.04 | 0.166 |
| 1tjy | A   | 316   | 1.3  | 0.156 |
| 1tk4 | A   | 118   | 1.1  | 0.168 |
| 1tlj | A   | 160   | 2.8  | 0.223 |
| 1tlo | A   | 317   | 1.9  | 0.238 |
| 1tm9 | A   | 137   | N/A  |       |
| 1tmf | 4   | 31    | 3.5  | N/A   |
| 1tmi | A   | 110   | 1.7  | 0.146 |
| 1tml | A   | 286   | 1.8  | 0.184 |
| 1tmz | A   | 32    | N/A  |       |
| 1tnt | A   | 76    | N/A  |       |
| 1to4 | A   | 156   | 1.55 | 0.157 |
| 1to6 | A   | 288   | 2.5  | 0.226 |
| 1tol | A   | 155   | 1.85 | 0.228 |
| 1tov | A   | 98    | 1.77 | 0.211 |
| 1tp4 | A   | 59    | N/A  |       |
| 1tp6 | A   | 126   | 1.5  | 0.185 |
| 1tpg | A   | 91    | N/A  |       |
| 1tq1 | A   | 119   | N/A  |       |
| 1tq6 | A   | 310   | 2.7  | 0.204 |
| 1tqg | A   | 71    | 0.98 | 0.179 |
| 1tqh | A   | 242   | 1.63 | 0.168 |
| 1tqq | A   | 326   | 2.75 | 0.264 |
| 1tr9 | A   | 318   | 1.8  | 0.17  |
| 1ts9 | A   | 93    | 1.7  | 0.204 |
| 1tsp | A   | 544   | 2    | 0.184 |
| 1ttb | A   | 115   | 1.7  | 0.157 |
| 1ttf | A   | 94    | N/A  |       |
| 1ttu | A   | 275   | 2.85 | 0.201 |
| 1tu1 | A   | 144   | 1.95 | 0.205 |
| 1tu2 | A   | 105   | N/A  |       |
| 1tua | A   | 189   | 1.5  | 0.208 |
| 1tuc | A   | 60    | 2.02 | 0.214 |
| 1tue | D   | 202   | 2.1  | 0.219 |
| 1tul | A   | 101   | 2.2  | 0.181 |
| 1tuz | A   | 118   | N/A  |       |
| 1tv8 | A   | 327   | 2.2  | 0.213 |
| 1vt  | A   | 75    | N/A  |       |
| 1tvv | A   | 283   | 2.3  | 0.209 |
| 1tw6 | B   | 95    | 1.71 | 0.155 |
| 1twc | E   | 111   | 3    | 0.234 |
| 1twf | F/J | 68/56 | 2.3  | 0.247 |
| 1twj | A   | 77    | 2.5  | 0.248 |
| 1txb | A   | 73    | N/A  |       |
| 1txg | A   | 335   | 1.7  | 0.149 |
| 1txj | A   | 152   | 2    | 0.199 |
| 1txl | A   | 188   | 1.7  | 0.228 |

|      |   |     |      |       |
|------|---|-----|------|-------|
| 1txo | B | 231 | 1.95 | 0.199 |
| 1txu | A | 182 | 2.35 | 0.227 |
| 1tyk | A | 34  | N/A  |       |
| 1tzb | A | 300 | 1.16 | 0.149 |
| 1tzw | A | 137 | 1.6  | 0.187 |
| 1u00 | A | 219 | 1.95 | 0.174 |
| 1u04 | A | 507 | 2.25 | 0.227 |
| 1u07 | A | 90  | 1.13 | 0.139 |
| 1u09 | A | 476 | 1.91 | 0.21  |
| 1u0k | A | 281 | 1.5  | 0.167 |
| 1u0s | A | 84  | 1.9  | 0.227 |
| 1u10 | C | 235 | 2.4  | 0.234 |
| 1u14 | A | 167 | 1.68 | 0.182 |
| 1u19 | A | 270 | 2.2  | 0.2   |
| 1u26 | A | 314 | 2.5  | 0.207 |
| 1u2c | A | 220 | 2.3  | 0.208 |
| 1u2l | A | 307 | 2.3  | 0.175 |
| 1u2m | C | 98  | 2.3  | 0.232 |
| 1u2z | C | 349 | 2.2  | 0.213 |
| 1u3e | M | 156 | 2.92 | 0.216 |
| 1u3u | A | 374 | 1.6  | 0.169 |
| 1u4g | A | 298 | 1.4  | 0.18  |
| 1u5k | A | 231 | 2    | 0.198 |
| 1u5m | A | 73  | N/A  |       |
| 1u5p | A | 200 | 2    | 0.187 |
| 1u6g | C | 776 | 3.1  | 0.243 |
| 1u6k | A | 266 | 1.55 | 0.178 |
| 1u7g | A | 372 | 1.4  | 0.133 |
| 1u7h | A | 333 | 1.8  | 0.158 |
| 1u7i | A | 130 | 1.4  | 0.147 |
| 1u7k | A | 129 | 1.85 | 0.21  |
| 1u7l | A | 360 | 1.75 | 0.21  |
| 1u7p | A | 163 | 1.9  | 0.19  |
| 1u84 | A | 81  | 1.6  | 0.205 |
| 1u8c | B | 346 | 3.1  | 0.293 |
| 1u8v | A | 490 | 1.6  | 0.163 |
| 1u98 | A | 269 | 2    | 0.2   |
| 1u9j | A | 299 | 2.4  | 0.205 |
| 1u9l | B | 68  | 1.9  | 0.216 |
| 1uaa | A | 477 | 3    | 0.228 |
| 1uai | A | 223 | 1.2  | 0.17  |
| 1uam | A | 250 | 2.2  | 0.22  |
| 1uan | A | 212 | 2    | 0.201 |
| 1uar | A | 273 | 1.7  | 0.206 |
| 1ub1 | A | 125 | N/A  |       |
| 1ub4 | C | 62  | 1.7  | 0.21  |
| 1ubr | S | 267 | 1.34 | 0.134 |
| 1ubw | A | 320 | 2.5  | 0.192 |
| 1uc2 | A | 478 | 2.15 | 0.168 |
| 1uc6 | A | 60  | N/A  |       |
| 1ucp | A | 91  | N/A  |       |
| 1ucr | B | 75  | 1.2  | 0.138 |

|      |   |      |      |       |
|------|---|------|------|-------|
| 1ucu | A | 494  | 4    |       |
| 1ud9 | A | 236  | 1.68 | 0.202 |
| 1udh | A | 228  | 1.75 | 0.191 |
| 1udk | A | 51   | N/A  |       |
| 1udl | A | 98   | N/A  |       |
| 1udx | A | 381  | 2.07 | 0.226 |
| 1ue0 | A | 176  | 2    | 0.203 |
| 1uea | D | 158  | 2.8  | 0.197 |
| 1ueb | A | 179  | 1.65 | 0.213 |
| 1uec | A | 176  | 1.82 | 0.213 |
| 1uel | B | 48   | N/A  |       |
| 1ufg | A | 151  | N/A  |       |
| 1ufi | A | 48   | 1.65 | 0.232 |
| 1ufk | A | 247  | 1.9  | 0.232 |
| 1ufy | A | 118  | 0.96 | 0.11  |
| 1ug0 | A | 88   | N/A  |       |
| 1ug1 | A | 92   | N/A  |       |
| 1ug4 | A | 56   | 1.6  | 0.239 |
| 1ugl | A | 50   | N/A  |       |
| 1ugp | A | 201  | 1.63 | 0.182 |
| 1ugq | B | 228  | 2    | 0.184 |
| 1uh4 | A | 637  | 1.8  | 0.165 |
| 1uha | A | 82   | 1.5  | 0.176 |
| 1uhc | A | 79   | N/A  |       |
| 1uhr | A | 93   | N/A  |       |
| 1uhu | A | 105  | N/A  |       |
| 1uhw | A | 109  | N/A  |       |
| 1ui0 | A | 192  | 1.5  | 0.183 |
| 1uix | A | 68   | 1.8  | 0.193 |
| 1uiz | A | 115  | 2.5  | 0.241 |
| 1uj2 | A | 213  | 1.8  | 0.19  |
| 1uj8 | A | 73   | 1.75 | 0.194 |
| 1ujl | A | 42   | N/A  |       |
| 1ujz | A | 88   | N/A  |       |
| 1ukf | A | 188  | 1.35 | 0.204 |
| 1ukk | A | 136  | 1.6  | 0.178 |
| 1ukx | A | 137  | N/A  |       |
| 1uky | A | 196  | 2.13 | 0.178 |
| 1ul5 | A | 86   | N/A  |       |
| 1ulb | A | 289  | 2.75 | 0.204 |
| 1ulr | A | 87   | 1.3  | 0.187 |
| 1uly | A | 185  | 2.5  | 0.204 |
| 1um0 | A | 322  | 1.95 | 0.214 |
| 1um7 | A | 113  | N/A  |       |
| 1umg | A | 359  | 1.8  | 0.183 |
| 1un1 | A | 239  | 2.1  | 0.206 |
| 1un2 | A | 171  | 2.4  | 0.206 |
| 1und | A | 36   | N/A  |       |
| 1unl | D | 150  | 2.2  | 0.216 |
| 1unn | D | 112  | 1.9  | 0.179 |
| 1uon | A | 1238 | 7.6  | N/A   |
| 1uoy | A | 64   | 1.5  | 0.164 |

|      |     |        |      |       |
|------|-----|--------|------|-------|
| 1uoz | A   | 296    | 1.1  | 0.112 |
| 1upg | B   | 97     | 1.8  | 0.186 |
| 1upt | B   | 47     | 1.7  | 0.221 |
| 1uqr | K   | 151    | 1.7  | 0.178 |
| 1urj | B   | 968    | 3    | 0.235 |
| 1urk | A   | 130    | N/A  |       |
| 1urr | A   | 97     | 1.5  | 0.16  |
| 1us4 | A   | 293    | 1.75 | 0.178 |
| 1us7 | B   | 165    | 2.3  | 0.185 |
| 1usc | A   | 163    | 1.24 | 0.203 |
| 1uso | B   | 79     | 1.3  | 0.216 |
| 1usv | F   | 36     | 2.7  | 0.229 |
| 1ut1 | A   | 140    | 1.7  | 0.173 |
| 1ut3 | A   | 38     | N/A  |       |
| 1ut4 | B   | 150    | 2.5  | 0.225 |
| 1ut8 | B   | 271    | 2.75 | 0.235 |
| 1ute | A   | 302    | 1.55 | 0.213 |
| 1utx | A   | 66     | 1.9  | 0.153 |
| 1uuc | A   | 55     | N/A  |       |
| 1uoj | D   | 76     | 1.75 | 0.19  |
| 1uuq | A   | 402    | 1.5  | 0.121 |
| 1uv7 | A   | 74     | 1.7  | 0.196 |
| 1uvy | A   | 104    | 2.4  | 0.211 |
| 1uw0 | A   | 117    | N/A  |       |
| 1uw1 | A   | 66     | 1.94 | 0.2   |
| 1uw2 | A   | 61     | N/A  |       |
| 1uw4 | C/D | 91/245 | 1.95 | 0.204 |
| 1uw6 | A   | 208    | 2.2  | 0.222 |
| 1uw7 | A   | 104    | 2.8  | 0.228 |
| 1uwc | A   | 261    | 1.08 | 0.115 |
| 1uwf | A   | 158    | 1.69 | 0.179 |
| 1uwk | A   | 554    | 1.19 | 0.14  |
| 1uwv | A   | 407    | 1.95 | 0.186 |
| 1uww | A   | 181    | 1.4  | 0.189 |
| 1ux5 | A   | 250    | 2.5  | 0.207 |
| 1uxa | A   | 185    | 1.5  | 0.18  |
| 1uxo | A   | 184    | 1.8  | 0.125 |
| 1uxy | A   | 340    | 1.8  | 0.202 |
| 1uz5 | A   | 344    | 2.05 | 0.218 |
| 1uzb | A   | 516    | 1.4  | 0.177 |
| 1uzj | A   | 149    | 2.25 | 0.247 |
| 1uzv | A   | 106    | 1    | 0.115 |
| 1uzx | A   | 132    | 1.85 | 0.241 |
| 1v0d | A   | 131    | 2.6  | 0.218 |
| 1v0f | A   | 666    | 2.55 | 0.18  |
| 1v0j | A   | 386    | 2.25 | 0.225 |
| 1v18 | B   | 26     | 2.1  | 0.207 |
| 1v1h | A   | 75     | 1.9  | 0.182 |
| 1v1m | B   | 333    | 2    | 0.129 |
| 1v2b | B   | 151    | 1.6  | 0.186 |
| 1v2x | A   | 183    | 1.5  | 0.225 |
| 1v30 | A   | 118    | 1.4  | 0.217 |

|      |   |     |      |       |
|------|---|-----|------|-------|
| 1v31 | A | 93  | N/A  |       |
| 1v32 | A | 101 | N/A  |       |
| 1v33 | A | 346 | 1.8  | 0.219 |
| 1v3w | A | 172 | 1.5  | 0.185 |
| 1v4a | A | 406 | 2    | 0.228 |
| 1v4v | A | 362 | 1.8  | 0.209 |
| 1v55 | W | 54  | 1.9  | 0.203 |
| 1v56 | A | 34  | N/A  |       |
| 1v5j | A | 108 | N/A  |       |
| 1v5l | A | 103 | N/A  |       |
| 1v5r | A | 97  | N/A  |       |
| 1v5t | A | 90  | N/A  |       |
| 1v64 | A | 108 | N/A  |       |
| 1v65 | A | 64  | N/A  |       |
| 1v6c | B | 436 | 1.8  | 0.196 |
| 1v6g | A | 81  | N/A  |       |
| 1v6s | A | 390 | 1.5  | 0.201 |
| 1v6z | A | 226 | 2    | 0.197 |
| 1v70 | A | 104 | 1.3  | 0.203 |
| 1v7b | A | 175 | 1.9  | 0.208 |
| 1v7l | B | 154 | 1.98 | 0.206 |
| 1v7o | A | 128 | 2.62 | 0.235 |
| 1v7r | A | 186 | 1.4  | 0.202 |
| 1v8c | A | 165 | 1.6  | 0.221 |
| 1v8d | A | 187 | 2.16 | 0.189 |
| 1v8h | A | 106 | 1.2  | 0.211 |
| 1v8p | F | 132 | 2.52 | 0.25  |
| 1v96 | A | 144 | 1.75 | 0.209 |
| 1v9l | A | 358 | 2.8  | 0.2   |
| 1v9p | A | 501 | 2.9  | 0.232 |
| 1v9x | A | 114 | N/A  |       |
| 1vae | A | 111 | N/A  |       |
| 1vaj | A | 201 | 1.82 | 0.202 |
| 1vas | A | 137 | 2.75 | 0.152 |
| 1vb5 | B | 275 | 2.2  | 0.209 |
| 1vc2 | A | 170 | 2.6  | 0.225 |
| 1vcc | A | 77  | 1.6  | 0.218 |
| 1vdd | A | 188 | 2.5  | 0.233 |
| 1vea | B | 45  | 2.8  | 0.23  |
| 1vek | A | 84  | N/A  |       |
| 1vf5 | Q | 34  | 3    | 0.258 |
| 1vf6 | B | 57  | 2.1  | 0.242 |
| 1vf7 | E | 145 | 2.4  | 0.258 |
| 1vfg | B | 181 | 2.8  | 0.23  |
| 1vfr | A | 208 | 1.8  | 0.187 |
| 1vfs | A | 379 | 1.9  | 0.209 |
| 1vfy | A | 67  | 1.15 | 0.174 |
| 1vg4 | A | 110 | 3.3  | 0.277 |
| 1vgg | A | 159 | 1.75 | 0.18  |
| 1vgh | A | 55  | N/A  |       |
| 1vgy | A | 369 | 1.9  | 0.213 |
| 1vhe | A | 354 | 1.9  | 0.176 |

|      |   |     |      |       |
|------|---|-----|------|-------|
| 1vhh | A | 157 | 1.7  | 0.191 |
| 1vho | A | 313 | 1.86 | 0.212 |
| 1vhv | B | 246 | 1.75 | 0.211 |
| 1vhw | A | 237 | 1.54 | 0.162 |
| 1vi0 | A | 184 | 1.65 | 0.231 |
| 1vi3 | A | 156 | 1.76 | 0.192 |
| 1vi4 | A | 156 | 1.87 | 0.229 |
| 1vi7 | A | 189 | 2.8  | 0.261 |
| 1vio | A | 230 | 1.59 | 0.196 |
| 1vj2 | A | 114 | 1.65 | 0.208 |
| 1vj7 | A | 325 | 2.1  | 0.236 |
| 1vjn | A | 188 | 2    | 0.178 |
| 1vjq | A | 71  | 2.1  | 0.199 |
| 1vju | B | 291 | 1.4  | 0.151 |
| 1vjv | A | 359 | 1.74 | 0.179 |
| 1vk1 | A | 223 | 1.2  | 0.165 |
| 1vk5 | A | 121 | 1.6  | 0.16  |
| 1vk6 | A | 65  | 2.2  | 0.187 |
| 1vk8 | C | 91  | 1.8  | 0.142 |
| 1vkc | A | 149 | 1.89 | 0.207 |
| 1vki | B | 166 | 1.6  | 0.152 |
| 1vkm | E | 282 | 1.9  | 0.154 |
| 1vkw | A | 212 | 2    | 0.21  |
| 1vky | B | 281 | 2    | 0.18  |
| 1vlo | A | 348 | 1.7  | 0.159 |
| 1vlp | B | 407 | 1.75 | 0.17  |
| 1vm0 | B | 99  | 1.8  | 0.174 |
| 1vma | B | 294 | 1.6  | 0.207 |
| 1vmf | A | 136 | 1.46 | 0.148 |
| 1vmg | A | 80  | 1.46 | 0.142 |
| 1vp3 | A | 291 | 1.9  | 0.215 |
| 1vp6 | A | 133 | 1.7  | 0.19  |
| 1vp8 | A | 183 | 1.3  | 0.154 |
| 1vpb | A | 415 | 1.75 | 0.178 |
| 1vpd | A | 279 | 1.65 | 0.12  |
| 1vpm | A | 149 | 1.66 | 0.17  |
| 1vpr | A | 344 | 1.8  | 0.199 |
| 1vpu | A | 45  | N/A  |       |
| 1vpz | A | 54  | 2.05 | 0.218 |
| 1vqq | A | 635 | 1.8  | 0.237 |
| 1vqr | A | 272 | 2.25 | 0.193 |
| 1vqs | B | 106 | 1.5  | 0.151 |
| 1vqu | A | 314 | 1.85 | 0.179 |
| 1vqv | B | 209 | 2.65 | 0.238 |
| 1vqz | A | 316 | 1.99 | 0.159 |
| 1vr0 | C | 229 | 2.49 | 0.19  |
| 1vr3 | A | 161 | 2.06 | 0.162 |
| 1vr4 | A | 103 | 2.09 | 0.21  |
| 1vrn | L | 272 | 2.2  | 0.191 |
| 1vrs | B | 123 | 2.85 | 0.224 |
| 1vsg | A | 362 | 2.9  | 0.22  |
| 1vtx | A | 42  | N/A  |       |

|      |       |             |      |       |
|------|-------|-------------|------|-------|
| 1vve | A     | 118         | N/A  |       |
| 1vyi | A     | 110         | 1.5  | 0.173 |
| 1vyx | A     | 60          | N/A  |       |
| 1vz8 | B     | 372         | 2.75 | 0.235 |
| 1vzm | A     | 39          | 1.4  | 0.192 |
| 1vzo | A     | 308         | 1.8  | 0.208 |
| 1vzs | A     | 76          | N/A  |       |
| 1vzy | A     | 277         | 1.97 | 0.197 |
| 1w0h | A     | 194         | 1.59 | 0.168 |
| 1w0j | G     | 52          | 2.2  | 0.184 |
| 1w0n | A     | 116         | 0.8  | 0.129 |
| 1w0u | A     | 55          | 1.8  | 0.22  |
| 1w1y | B     | 497         | 1.85 | 0.17  |
| 1w23 | A     | 359         | 1.08 | 0.117 |
| 1w26 | A     | 272         | 2.7  | 0.241 |
| 1w27 | A     | 679         | 1.7  | 0.166 |
| 1w2b | O/R   | 138/72      | 3.5  | 0.192 |
| 1w2f | A     | 257         | 1.8  | 0.203 |
| 1w2w | A/N   | 207/190     | 1.75 | 0.174 |
| 1w2y | A     | 226         | 1.65 | 0.151 |
| 1w33 | A     | 74          | 2.7  | 0.224 |
| 1w36 | C     | 592         | 3.1  | 0.242 |
| 1w3d | A     | 46          | N/A  |       |
| 1w3f | A     | 276         | 2.58 | 0.231 |
| 1w4r | A     | 173         | 1.83 | 0.159 |
| 1w4x | A     | 533         | 1.7  | 0.212 |
| 1w53 | A     | 83          | 1.6  | 0.198 |
| 1w5c | P/U/Y | 179/100/359 | 3.2  | N/A   |
| 1w5f | A     | 315         | 2    | 0.203 |
| 1w6s | C     | 595         | 1.2  | 0.158 |
| 1w70 | A     | 56          | 1.46 | 0.181 |
| 1w7b | A     | 319         | 1.52 | 0.216 |
| 1w7j | A     | 747         | 2    | 0.194 |
| 1w7o | A     | 118         | 1.81 | 0.176 |
| 1w7p | B/D   | 148/152     | 3.6  | 0.292 |
| 1w8o | A     | 592         | 1.7  | 0.162 |
| 1w8x | N/P   | 114/80      | 4.2  | N/A   |
| 1w94 | A     | 148         | 2    | 0.198 |
| 1w9h | A     | 398         | 1.95 | 0.192 |
| 1wa9 | B     | 63          | 3.15 | 0.228 |
| 1wap | A     | 68          | 1.8  | 0.178 |
| 1wb1 | C     | 238         | 3    | 0.317 |
| 1wb4 | A     | 281         | 1.4  | 0.111 |
| 1wb8 | A     | 205         | 2.3  | 0.167 |
| 1wba | A     | 171         | 1.8  | 0.19  |
| 1wd5 | A     | 205         | 2    | 0.195 |
| 1wd7 | B     | 252         | 1.6  | 0.224 |
| 1wdd | W     | 120         | 1.35 | 0.16  |
| 1wdj | A     | 186         | 2    | 0.189 |
| 1we8 | A     | 104         | N/A  |       |
| 1weh | A     | 169         | 1.8  | 0.185 |
| 1wem | A     | 76          | N/A  |       |

|      |   |     |     |       |
|------|---|-----|-----|-------|
| 1weo | A | 93  | N/A |       |
| 1weq | A | 85  | N/A |       |
| 1wer | A | 319 | 1.6 | 0.221 |
| 1weu | A | 91  | N/A |       |
| 1wew | A | 78  | N/A |       |
| 1wfk | A | 88  | N/A |       |
| 1wfm | A | 138 | N/A |       |
| 1wfp | A | 74  | N/A |       |
| 1wfr | A | 143 | N/A |       |
| 1wfw | A | 74  | N/A |       |
| 1wfx | A | 175 | 2.8 | 0.22  |
| 1wfy | A | 104 | N/A |       |
| 1wFz | A | 130 | N/A |       |
| 1wg2 | A | 64  | N/A |       |
| 1wg5 | A | 104 | N/A |       |
| 1wgf | A | 90  | N/A |       |
| 1wgg | A | 96  | N/A |       |
| 1wgk | A | 114 | N/A |       |
| 1wgm | A | 98  | N/A |       |
| 1wgo | A | 123 | N/A |       |
| 1wgy | A | 104 | N/A |       |
| 1whb | A | 157 | N/A |       |
| 1whc | A | 64  | N/A |       |
| 1whf | A | 73  | N/A |       |
| 1whk | A | 91  | N/A |       |
| 1whm | A | 92  | N/A |       |
| 1whn | A | 128 | N/A |       |
| 1whq | A | 99  | N/A |       |
| 1whr | A | 124 | N/A |       |
| 1whs | B | 144 | 2   | 0.175 |
| 1whv | A | 100 | N/A |       |
| 1wi0 | A | 113 | N/A |       |
| 1wi8 | A | 104 | N/A |       |
| 1wic | A | 152 | N/A |       |
| 1wif | A | 126 | N/A |       |
| 1wig | A | 73  | N/A |       |
| 1wij | A | 127 | N/A |       |
| 1wik | A | 109 | N/A |       |
| 1wim | A | 94  | N/A |       |
| 1win | A | 143 | N/A |       |
| 1wip | A | 363 | 4   | 0.452 |
| 1wix | A | 164 | N/A |       |
| 1wiz | A | 101 | N/A |       |
| 1wj4 | A | 124 | N/A |       |
| 1wj9 | A | 188 | 1.9 | 0.228 |
| 1wjj | A | 145 | N/A |       |
| 1wjp | A | 107 | N/A |       |
| 1wjr | A | 127 | N/A |       |
| 1wjw | A | 112 | N/A |       |
| 1wk1 | A | 150 | N/A |       |
| 1wkc | A | 166 | 1.7 | 0.218 |
| 1wkr | A | 340 | 1.3 | 0.147 |

|      |   |     |      |       |
|------|---|-----|------|-------|
| 1wkt | A | 88  | N/A  |       |
| 1wlh | A | 260 | 2.8  | 0.257 |
| 1wlq | C | 142 | 2.8  | 0.231 |
| 1wm2 | A | 78  | 1.6  | 0.169 |
| 1wmh | B | 82  | 1.5  | 0.216 |
| 1wmt | A | 41  | N/A  |       |
| 1wnh | A | 210 | 1.83 | 0.211 |
| 1wo9 | A | 35  | N/A  |       |
| 1woh | A | 303 | 1.75 | 0.219 |
| 1woq | A | 253 | 1.8  | 0.193 |
| 1wot | A | 98  | N/A  |       |
| 1wp1 | A | 33  | 2.56 | 0.252 |
| 1wpb | A | 159 | 2    | 0.19  |
| 1wpd | A | 34  | N/A  |       |
| 1wpg | A | 612 | 2.3  | 0.223 |
| 1wpm | A | 177 | 1.3  | 0.139 |
| 1wpx | B | 185 | 2.7  | 0.183 |
| 1wq8 | A | 99  | 1.9  | 0.192 |
| 1wqj | B | 80  | 1.6  | 0.184 |
| 1wri | A | 93  | 1.2  | 0.109 |
| 1ws7 | A | 107 | 1.9  | 0.188 |
| 1wte | A | 272 | 1.9  | 0.171 |
| 1wty | A | 114 | 2.2  | 0.23  |
| 1wu3 | I | 153 | 2.15 | 0.192 |
| 1wu9 | B | 67  | 1.54 | 0.181 |
| 1wub | A | 176 | 1.65 | 0.219 |
| 1wuf | A | 340 | 2.9  | 0.236 |
| 1wvi | A | 250 | 2.3  | 0.248 |
| 1www | W | 103 | 2.2  | 0.189 |
| 1wxi | A | 261 | 1.7  | 0.176 |
| 1wy2 | A | 351 | 1.7  | 0.187 |
| 1x6i | A | 86  | 1.2  | 0.171 |
| 1x74 | A | 354 | 1.79 | 0.16  |
| 1x7f | A | 330 | 2.3  | 0.171 |
| 1x7o | A | 261 | 2.37 | 0.206 |
| 1x82 | A | 183 | 1.5  | 0.161 |
| 1x99 | A | 141 | 1.4  | 0.174 |
| 1x9a | A | 87  | N/A  |       |
| 1x9n | A | 624 | 3    | 0.235 |
| 1x9y | A | 323 | 2.5  | 0.244 |
| 1xak | A | 68  | 1.8  | 0.223 |
| 1xb2 | B | 234 | 2.2  | 0.218 |
| 1xbn | A | 195 | 2.5  | 0.263 |
| 1xbr | A | 176 | 2.5  | 0.215 |
| 1xc0 | A | 33  | N/A  |       |
| 1xcb | A | 204 | 2.9  | 0.228 |
| 1xcg | E | 358 | 2.5  | 0.224 |
| 1xd3 | A | 215 | 1.45 | 0.166 |
| 1xd4 | A | 72  | 3.64 | 0.307 |
| 1xdn | A | 262 | 1.2  | 0.128 |
| 1xe0 | A | 108 | 1.7  | 0.208 |
| 1xex | B | 118 | 2.5  | 0.207 |

|      |   |     |      |       |
|------|---|-----|------|-------|
| 1xfd | A | 236 | 3    | 0.248 |
| 1xfi | A | 343 | 1.7  | 0.169 |
| 1xfs | A | 149 | 1.7  | 0.221 |
| 1xg0 | B | 67  | 0.97 | 0.107 |
| 1xg8 | A | 108 | 2.1  | 0.229 |
| 1xhj | A | 88  | N/A  |       |
| 1xho | C | 106 | 2.2  | 0.194 |
| 1xi7 | A | 47  | N/A  |       |
| 1xik | B | 331 | 1.7  | 0.206 |
| 1xiw | B | 64  | 1.9  | 0.204 |
| 1xiz | B | 154 | 2    | 0.203 |
| 1xjh | A | 62  | N/A  |       |
| 1xjt | A | 170 | 1.75 | 0.208 |
| 1xjv | A | 287 | 1.73 | 0.228 |
| 1xkb | A | 90  | 2.4  | 0.206 |
| 1xki | A | 122 | 1.8  | 0.189 |
| 1xkr | A | 205 | 1.75 | 0.226 |
| 1xkt | A | 166 | 2.6  | 0.258 |
| 1xl6 | A | 162 | 2.85 | 0.27  |
| 1xl8 | B | 568 | 2.2  | 0.199 |
| 1xly | B | 156 | 1.95 | 0.191 |
| 1xmq | M | 26  | 3    | 0.222 |
| 1xmw | A | 178 | N/A  |       |
| 1mx  | A | 380 | 2.1  | 0.168 |
| 1xod | B | 116 | 1.15 | 0.154 |
| 1xp0 | A | 326 | 1.79 | 0.193 |
| 1xpa | A | 113 | N/A  |       |
| 1xpv | A | 78  | N/A  |       |
| 1xqb | A | 161 | 2.85 | 0.279 |
| 1xqo | A | 253 | 1.03 | 0.158 |
| 1xqs | D | 53  | 2.9  | 0.237 |
| 1xrg | B | 136 | 2.2  | 0.193 |
| 1xri | A | 141 | 3.3  | 0.204 |
| 1xrs | B | 195 | 2.8  | 0.199 |
| 1xs0 | C | 129 | 1.58 | 0.225 |
| 1xs5 | A | 237 | 1.85 | 0.183 |
| 1xs9 | D | 81  | N/A  |       |
| 1xsk | A | 766 | 2.2  | 0.235 |
| 1xsl | A | 308 | 2.3  | 0.207 |
| 1xso | A | 150 | 1.49 | 0.104 |
| 1xsz | A | 328 | 1.41 | 0.202 |
| 1xte | A | 116 | 1.6  | 0.187 |
| 1xu4 | A | 296 | 2.4  | 0.196 |
| 1xuu | A | 348 | 1.9  | 0.207 |
| 1xv3 | A | 47  | N/A  |       |
| 1xwe | A | 151 | N/A  |       |
| 1xwh | A | 66  | N/A  |       |
| 1xwv | A | 127 | 1.83 | 0.221 |
| 1xxa | C | 72  | 2.2  | 0.2   |
| 1xxe | A | 268 | N/A  |       |
| 1xyz | A | 320 | 1.4  | 0.183 |
| 1xzp | A | 336 | 2.3  | 0.226 |

|      |   |     |      |       |
|------|---|-----|------|-------|
| 1xzz | A | 213 | 1.8  | 0.205 |
| 1y02 | A | 91  | 1.8  | 0.206 |
| 1y0u | A | 86  | 1.6  | 0.172 |
| 1y12 | C | 155 | 1.95 | 0.179 |
| 1y13 | A | 161 | 2.2  | 0.195 |
| 1y1v | A | 914 | 3.8  | 0.282 |
| 1y1x | A | 182 | 1.95 | 0.187 |
| 1y23 | E | 141 | 2.3  | 0.213 |
| 1y2i | A | 106 | 2.3  | 0.192 |
| 1y2s | A | 113 | N/A  |       |
| 1y4c | A | 466 | 1.9  | 0.202 |
| 1y51 | A | 87  | 1.65 | 0.205 |
| 1y60 | D | 165 | 1.9  | 0.209 |
| 1y67 | D | 214 | 1.85 | 0.184 |
| 1y6d | A | 114 | N/A  |       |
| 1y6x | A | 86  | 1.25 | 0.183 |
| 1y6z | B | 234 | 1.88 | 0.206 |
| 1y71 | B | 108 | 1.95 | 0.214 |
| 1y7j | A | 40  | N/A  |       |
| 1y7p | B | 216 | 1.9  | 0.211 |
| 1y7q | A | 98  | N/A  |       |
| 1y7r | A | 126 | 1.7  | 0.172 |
| 1y7y | A | 69  | 1.69 | 0.169 |
| 1y88 | A | 184 | 1.85 | 0.202 |
| 1y8c | A | 124 | 2.5  | 0.221 |
| 1y8r | E | 356 | 2.75 | 0.22  |
| 1y8t | A | 273 | 2    | 0.227 |
| 1y9i | A | 158 | 1.8  | 0.211 |
| 1y9j | A | 140 | N/A  |       |
| 1y9m | A | 517 | 1.89 | 0.165 |
| 1y9q | A | 173 | 1.9  | 0.199 |
| 1y9w | A | 137 | 1.9  | 0.202 |
| 1yb2 | A | 213 | 2.01 | 0.199 |
| 1yb3 | A | 163 | 1.6  | 0.204 |
| 1yb5 | A | 324 | 1.85 | 0.17  |
| 1ybt | C | 140 | 2.31 | 0.194 |
| 1ybx | B | 88  | 1.8  | 0.225 |
| 1ybz | A | 76  | 1.82 | 0.201 |
| 1yc9 | A | 408 | 1.8  | 0.189 |
| 1ycn | A | 278 | 2.51 | 0.22  |
| 1yd2 | A | 90  | 1.6  | 0.175 |
| 1ydl | A | 68  | 2.3  | 0.236 |
| 1yea | A | 107 | 1.9  | 0.19  |
| 1yez | A | 68  | N/A  |       |
| 1yf2 | A | 185 | 2.4  | 0.236 |
| 1yg2 | A | 137 | 2.2  | 0.233 |
| 1ygb | A | 448 | 2.48 | 0.199 |
| 1yge | A | 821 | 1.4  | 0.197 |
| 1ygp | A | 858 | 2.8  | 0.179 |
| 1ygt | A | 104 | 1.7  | 0.193 |
| 1ygy | A | 520 | 2.3  | 0.205 |
| 1yhu | S | 105 | 3.15 | 0.243 |

|      |       |         |      |       |
|------|-------|---------|------|-------|
| 1yis | A     | 403     | 2.4  | 0.174 |
| 1yle | A     | 320     | 1.7  | 0.19  |
| 1ylm | A     | 139     | 1.83 | 0.2   |
| 1ylq | A     | 93      | 2.02 | 0.217 |
| 1yn3 | A     | 98      | 1.35 | 0.218 |
| 1yn4 | A     | 99      | 1.8  | 0.233 |
| 1yni | A     | 440     | 2.2  | 0.219 |
| 1yoy | A     | 142     | 2    | 0.184 |
| 1yoz | B     | 115     | 2    | 0.231 |
| 1ypy | A     | 182     | 1.51 | 0.239 |
| 1yua | A     | 122     | N/A  |       |
| 1yui | A     | 54      | N/A  |       |
| 1yv5 | A     | 336     | 2    | 0.205 |
| 1yw4 | A     | 315     | 2    | 0.221 |
| 1yy7 | A     | 206     | 2.02 | 0.179 |
| 1z0r | A     | 53      | N/A  |       |
| 1zdb | A     | 38      | N/A  |       |
| 1zrr | A     | 179     | N/A  |       |
| 2abk | A     | 211     | 1.85 | 0.185 |
| 2abl | A     | 163     | 2.5  | 0.183 |
| 2ach | B     | 35      | 2.7  | 0.181 |
| 2adr | A     | 60      | N/A  |       |
| 2alc | A     | 65      | N/A  |       |
| 2ame | A     | 66      | 2    | 0.185 |
| 2atc | B     | 152     | 3    | 0.27  |
| 2b82 | A     | 211     | 1.25 | 0.165 |
| 2bb8 | A     | 71      | N/A  |       |
| 2bbi | A     | 71      | N/A  |       |
| 2bbk | L     | 124     | 1.75 | 0.167 |
| 2bbv | C     | 321     | 2.8  | 0.221 |
| 2ben | A     | 170     | 1.8  | 0.217 |
| 2beq | D     | 46      | 1.6  | 0.199 |
| 2bez | F     | 31      | 1.6  | 0.206 |
| 2bf9 | A     | 35      | 0.99 | 0.137 |
| 2bg5 | A     | 307     | 1.82 | 0.208 |
| 2bg9 | C/E   | 369/370 | 4    | N/A   |
| 2bgz | A     | 293     | 0.12 | N/A   |
| 2bh8 | B     | 87      | 1.9  | 0.192 |
| 2bhg | A     | 184     | 1.9  | 0.218 |
| 2bhn | A     | 14      | 3.2  | 0.216 |
| 2bid | A     | 197     | N/A  |       |
| 2bk6 | C     | 154     | 2.19 | 0.211 |
| 2bn2 | A     | 85      | 2.8  | 0.208 |
| 2bpa | 3-Jan | 426/36  | 3    | 0.209 |
| 2bs2 | C     | 206     | 1.78 | 0.229 |
| 2btv | B/T   | 844/256 | 3.5  | 0.266 |
| 2c8s | A     | 138     | 1.6  | 0.21  |
| 2cb5 | A     | 452     | 1.85 | 0.182 |
| 2cbh | A     | 36      | N/A  |       |
| 2ccy | A     | 125     | 1.67 | N/A   |
| 2ci2 | I     | 65      | 2    | 0.198 |
| 2cjn | A     | 97      | N/A  |       |

|      |        |              |      |       |
|------|--------|--------------|------|-------|
| 2cpo | A      | 298          | 2.1  | 0.186 |
| 2dpm | A      | 244          | 1.8  | 0.238 |
| 2dvh | A      | 23           | N/A  |       |
| 2erl | A      | 40           | 1    | 0.129 |
| 2evn | A      | 103          | N/A  |       |
| 2fcb | A      | 170          | 1.74 | 0.194 |
| 2fha | A      | 172          | 1.9  | 0.186 |
| 2g3p | A      | 196          | 1.9  | 0.26  |
| 2gep | A      | 456          | 1.9  | 0.175 |
| 2gli | A      | 155          | 2.6  | 0.228 |
| 2gmf | A      | 107          | 2.4  | 0.235 |
| 2gpr | A      | 152          | 2.5  | 0.186 |
| 2gva | A      | 87           | N/A  |       |
| 2hdh | A      | 280          | 2.2  | 0.198 |
| 2hmx | A      | 133          | N/A  |       |
| 2hqi | A      | 72           | N/A  |       |
| 2ifo | A      | 46           | N/A  | N/A   |
| 2ilk | A      | 153          | 1.6  | 0.163 |
| 2isb | A      | 175          | 1.66 | 0.174 |
| 2isd | B      | 493          | 2.5  | 0.227 |
| 2jhb | A      | 143          | N/A  |       |
| 2jqa | A      | 113          | N/A  |       |
| 2kfn | A      | 511          | 2.03 | 0.214 |
| 2lal | B      | 47           | 1.8  | 0.189 |
| 2lis | A      | 131          | 1.35 | 0.136 |
| 2mas | A      | 300          | 2.3  | 0.205 |
| 2mcm | A      | 112          | 1.5  | 0.153 |
| 2mcp | H      | 222          | 3.1  | 0.185 |
| 2mob | A      | 94           | N/A  |       |
| 2mrb | A      | 31           | N/A  |       |
| 2nbt | A      | 66           | N/A  |       |
| 2nef | A      | 136          | N/A  |       |
| 2nir | A      | 206          | 1.2  | 0.111 |
| 2occ | D//U/X | 134/68/60/32 | 2.3  | 0.209 |
| 2opo | C      | 77           | 1.75 | 0.198 |
| 2orc | A      | 71           | N/A  |       |
| 2paq | A      | 171          | 2.1  | 0.187 |
| 2pda | A      | 1231         | 3    | 0.234 |
| 2pk8 | A      | 94           | 1.85 | 0.207 |
| 2plc | A      | 256          | 2    | 0.198 |
| 2prg | C      | 17           | 2.3  | 0.207 |
| 2pth | A      | 193          | 1.2  | 0.196 |
| 2pvb | A      | 107          | 0.91 | 0.11  |
| 2rel | A      | 57           | N/A  |       |
| 2rmc | A      | 181          | 1.64 | 0.197 |
| 2tgf | A      | 50           | N/A  |       |
| 2tnf | A      | 142          | 1.4  | 0.201 |
| 2utg | A      | 70           | 1.64 | 0.19  |
| 2vsg | A      | 342          | 2.7  | 0.203 |
| 2wbc | A      | 183          | 2.3  | 0.187 |
| 3c2c | A      | 112          | 1.68 | 0.175 |
| 3eip | A      | 84           | 1.8  | 0.218 |

|      |     |         |      |       |
|------|-----|---------|------|-------|
| 3eng | A   | 213     | 1.9  | 0.145 |
| 3kin | B   | 117     | 3.1  | 0.289 |
| 3lri | A   | 83      | N/A  |       |
| 3nul | A   | 125     | 1.6  | 0.181 |
| 3pcf | R   | 233     | 2.15 | 0.179 |
| 3por | A   | 288     | 2.5  | 0.188 |
| 3rhn | A   | 114     | 2.1  | 0.194 |
| 3sli | A   | 678     | 1.8  | 0.187 |
| 3ssi | A   | 107     | 2.3  | 0.185 |
| 487d | K   | 148     | 7.5  | N/A   |
| 4bcl | A   | 349     | 1.9  | 0.178 |
| 4dpv | Z   | 532     | 2.9  | 0.283 |
| 4hb1 | A   | 44      | 2.9  | 0.234 |
| 4mt2 | A   | 61      | 2    | 0.197 |
| 4pro | D   | 143     | 2.4  | 0.191 |
| 4sgb | I   | 51      | 2.1  | 0.142 |
| 4tgl | A   | 265     | 2.6  | 0.129 |
| 4ubp | A   | 100     | 1.55 | 0.151 |
| 5acn | A   | 753     | 2.1  | 0.215 |
| 5gat | A   | 66      | N/A  |       |
| 5hpg | A   | 84      | 1.66 | 0.166 |
| 5r1r | A   | 637     | 3.1  | 0.196 |
| 7msf | A   | 123     | 2.8  | 0.2   |
| 8fab | A/B | 204/204 | 1.8  | 0.173 |
| 8prn | A   | 287     | 2.3  | 0.177 |

\* Indicates number of residues in PDB for which torsion angles were calculated with the SECSTR program.

N/A indicates that the value was not available.

NMR derived structures have N/A in Resolution column and no entry in the R-factor column.

Only protein fragments with all main-chain atoms having B-factor  $\leq 60$  ( $\text{\AA}^2$ ) were selected for clustering.
