# Supplementary material for: Functionally important segments in proteins dissected using Gene Ontology and geometric clustering of peptide fragments
Source: PubMed Central journal article supplement (PMC2397504; doi:10.1186/gb-2008-9-3-r52), 2008-03-10
Supplement: gb-2008-9-3-r52-S2.pdf [file gb-2008-9-3-r52-S2.pdf]

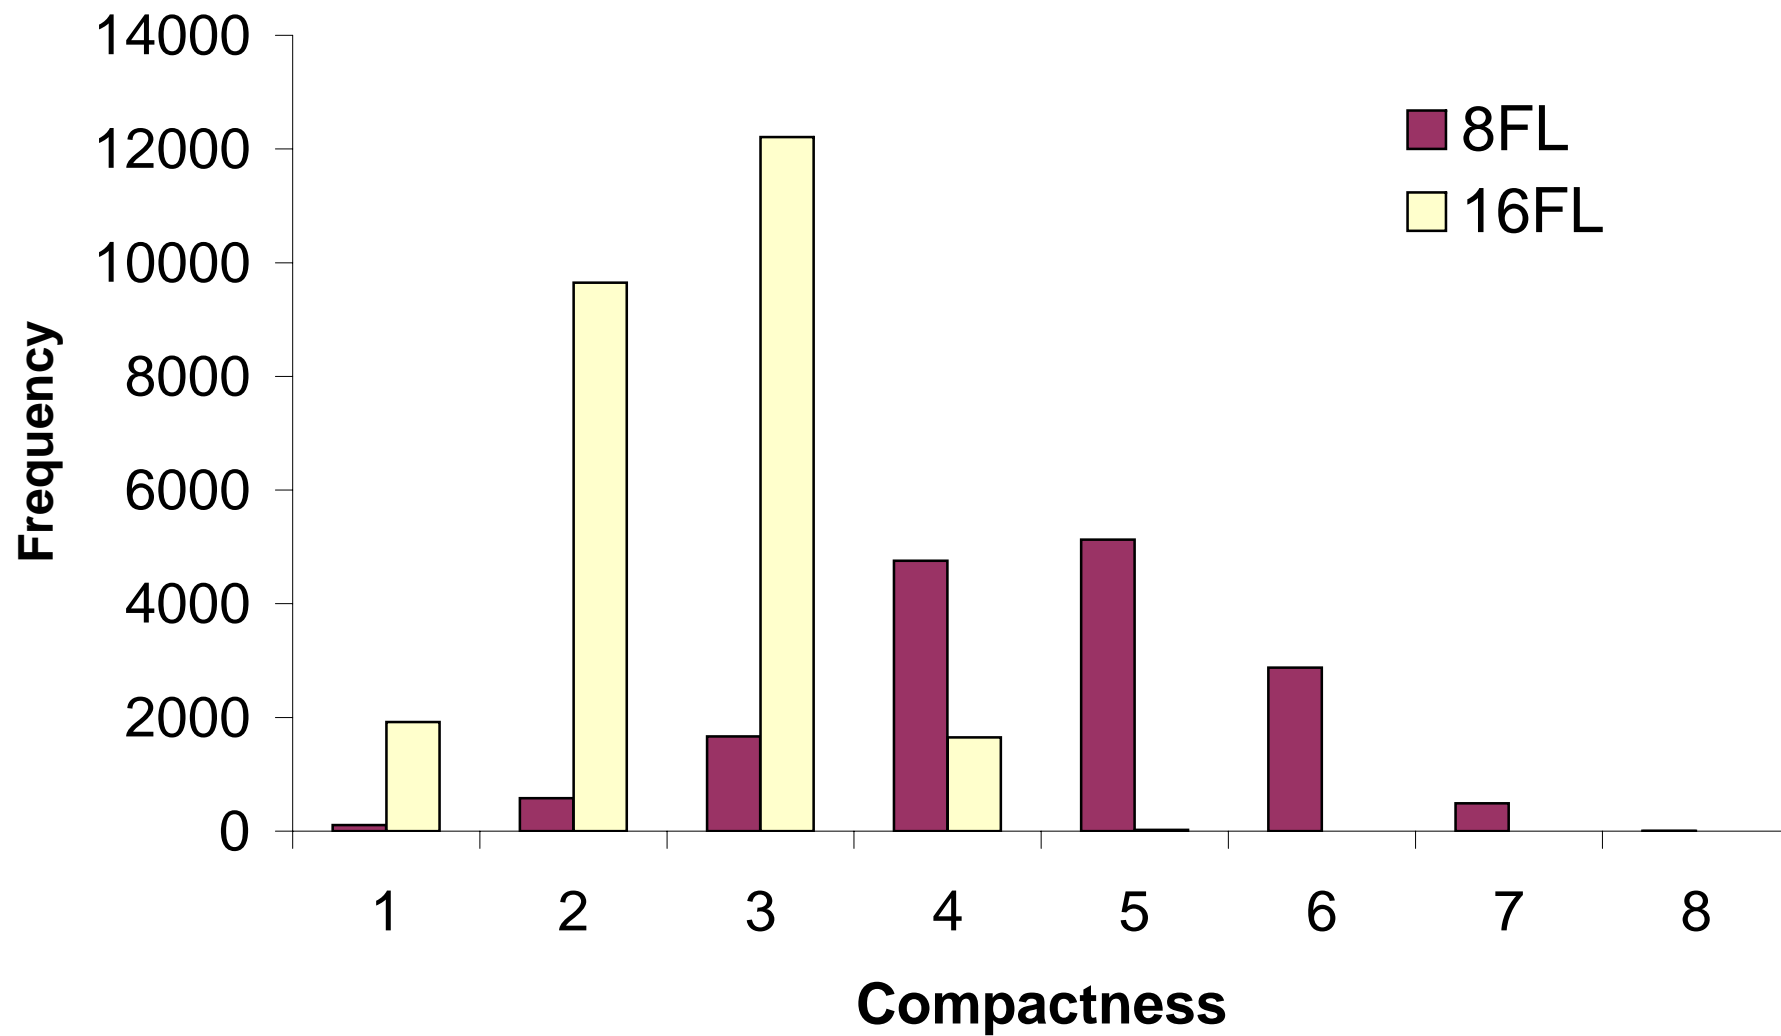

**Supp. Fig. 1.** Histogram showing the distribution of compactness values for 8 and 16 fragment length clusters. Bin 1 in X axis refers to values between 0 to 1 and so forth.
